# Supplementary material
Source: PubMed Central journal article supplement (PMC2953910)
Supplement: supp_M110.001214_mcp.M110.001214-1.pdf [file supp_M110.001214_mcp.M110.001214-1.pdf]

A

(a)

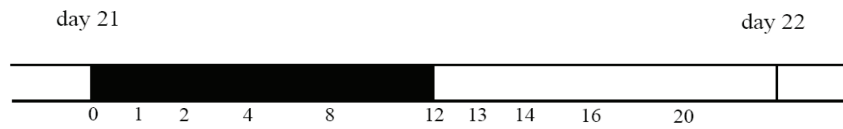

(b)

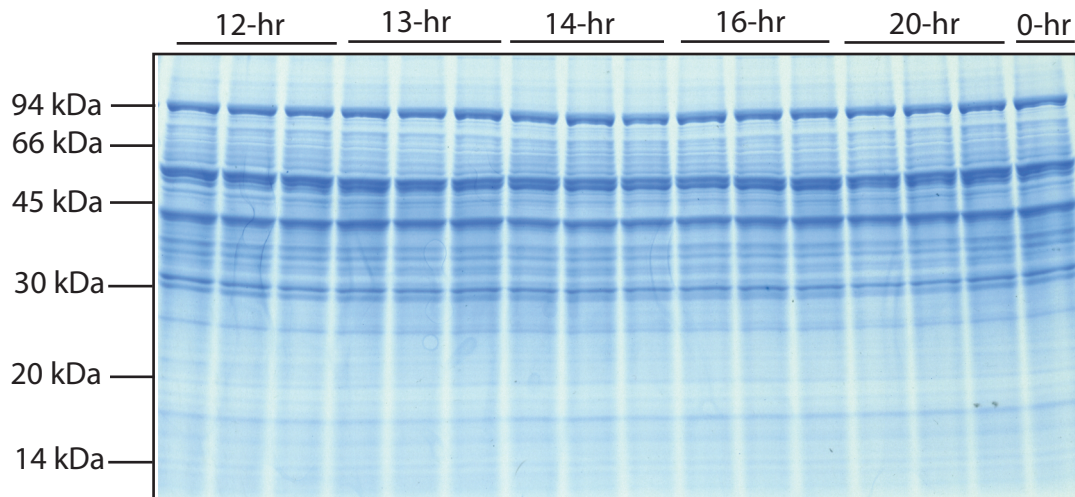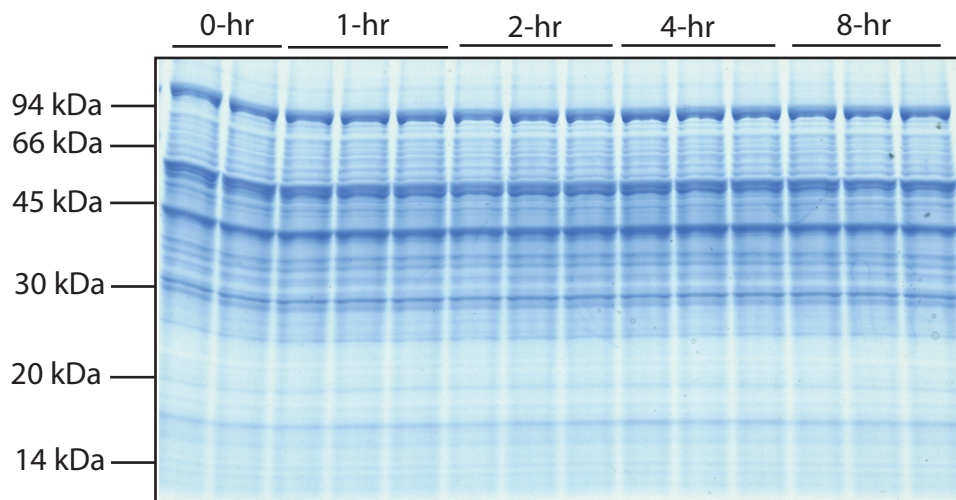

**Supplementary Figure 1. Mitochondrial samples over the diurnal timecourse**

**A. Experimental design and quality control of diurnal response in plant mitochondria.** (a) Numbers below the bar indicate the times (relative to the start of the dark period,  $t=0$ ) when the plant tissues were harvested for further experimentation. The black bar represents the dark period and the white bar represents the light period. (b) One-dimensional SDS-PAGE of mitochondria isolated at different time points in the diurnal cycle. Equal amounts of protein (10  $\mu\text{g}$ ) were loaded into each lane.

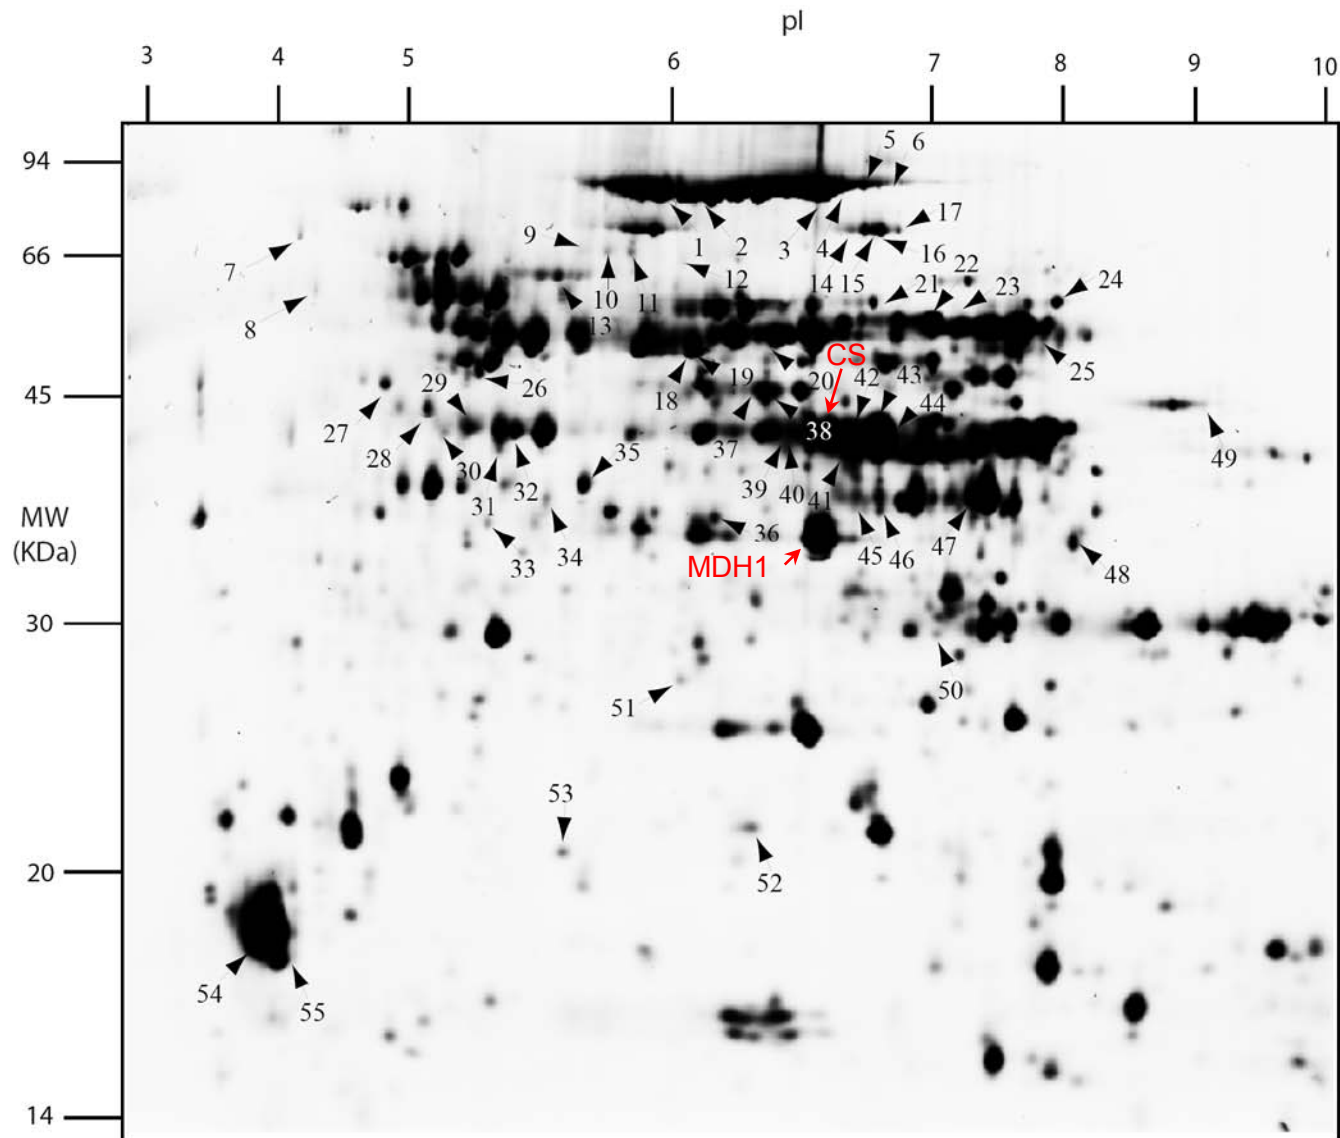

**B. A representative Cy2 image of a DIGE 2D IEF/SDS-PAGE showing spots selected for MS/MS analysis.** Arrows indicate protein spots that were changed in protein abundance over the 24-hr period (one-way ANOVA  $< 0.05$ ) and were able to match to their corresponding spot in the preparative gel. These protein spots were then unambiguously identified by MS/MS, the numbers correlate with Supplementary Table 1. 15 DIGE gels follow showing Cy3 and Cy5 labelling with specific samples. Red arrows show positions of citrate synthase (CS) and malate dehydrogenase (MDH1) that do not change in abundance (as mentioned in the text).

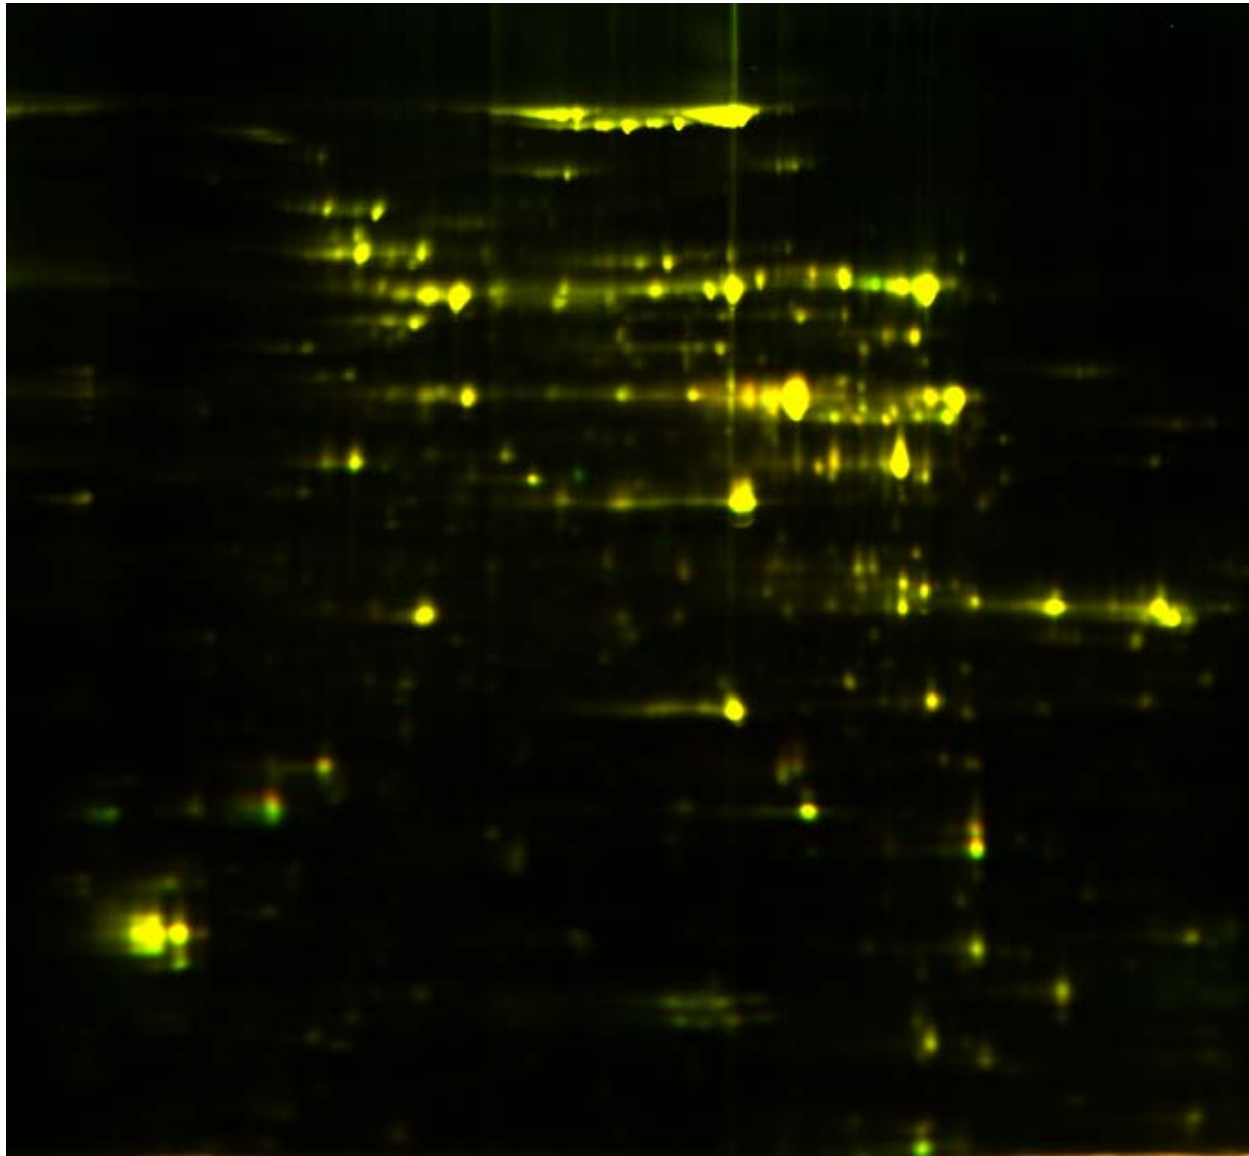

Green: 13 h

Red: 0 h

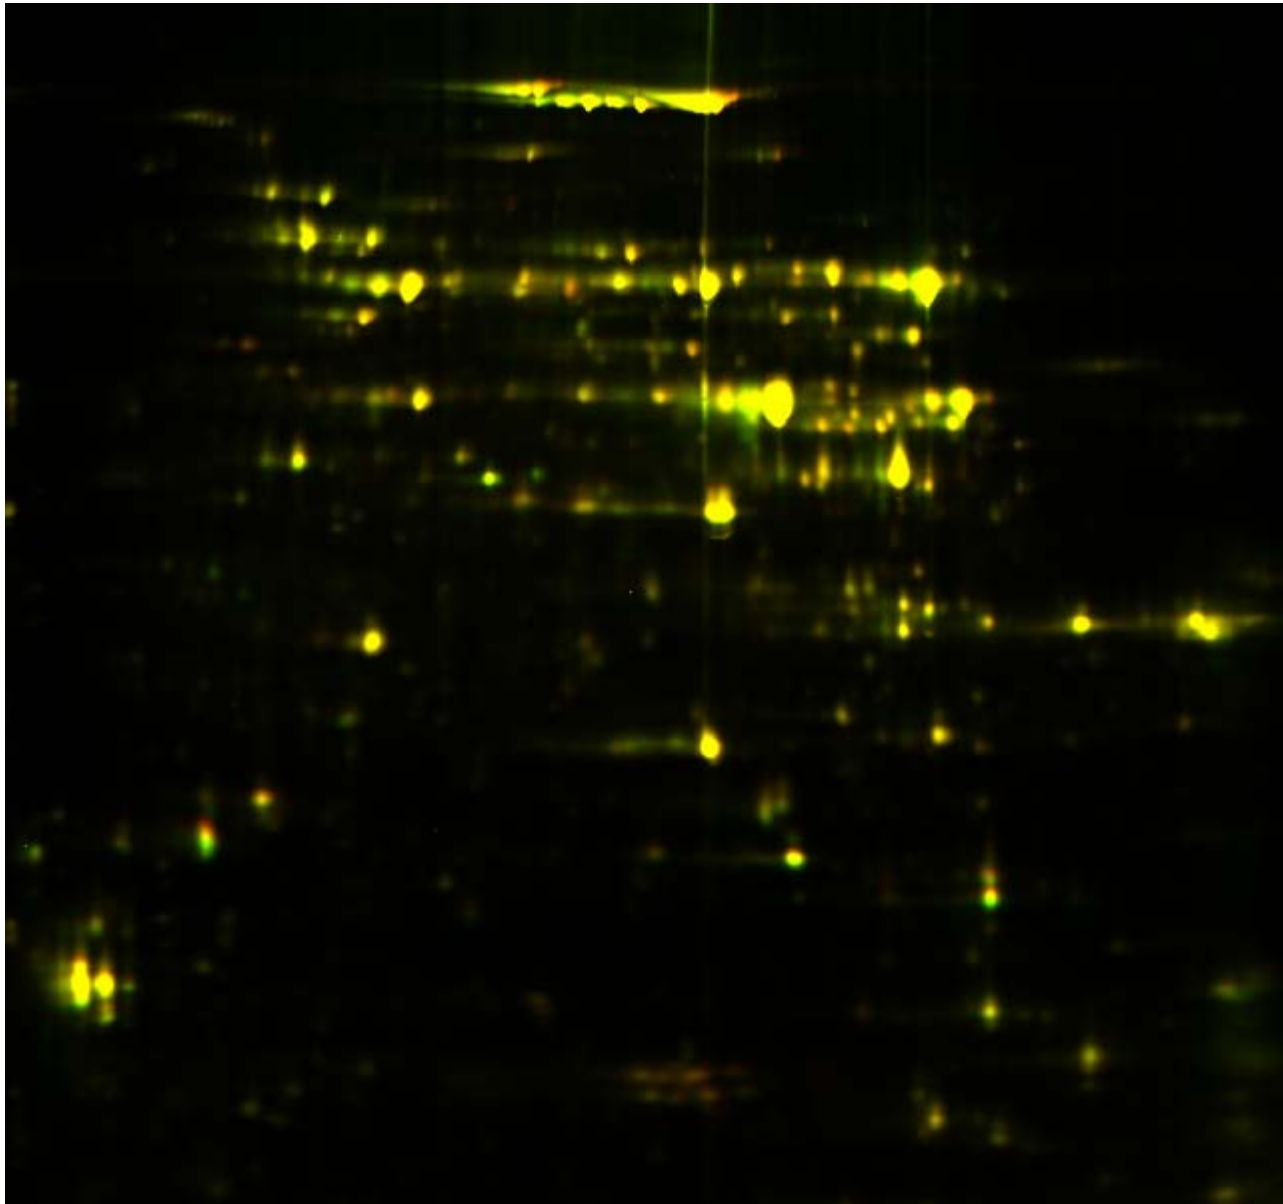

Green: 2 h

Red: 16 h

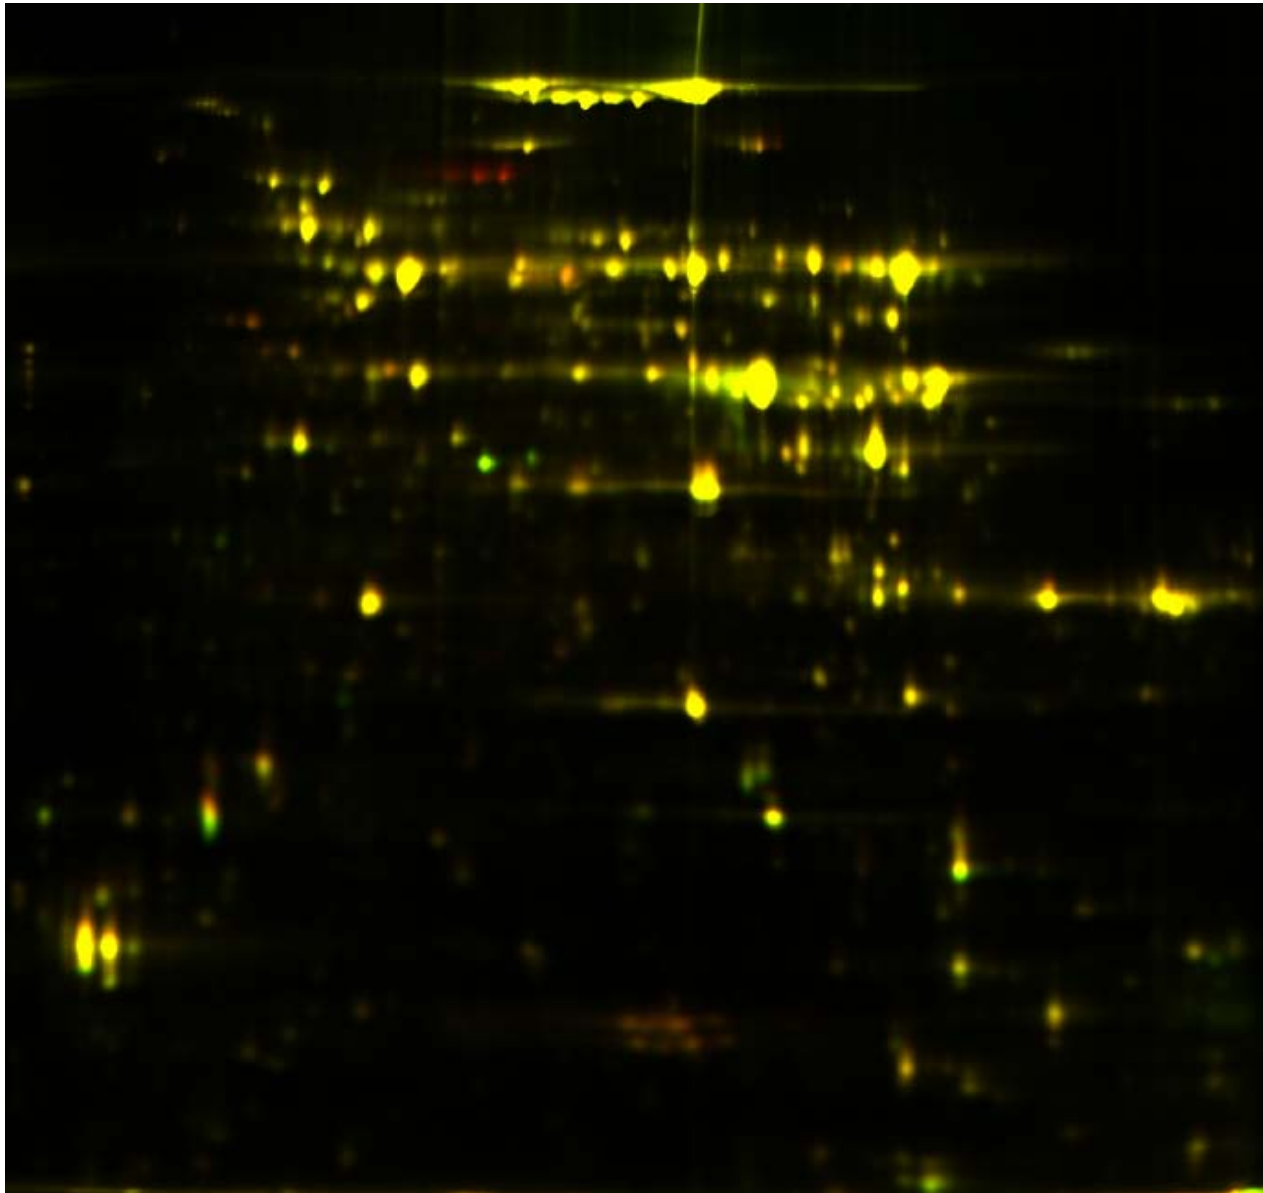

Green: 1 h

Red: 14 h

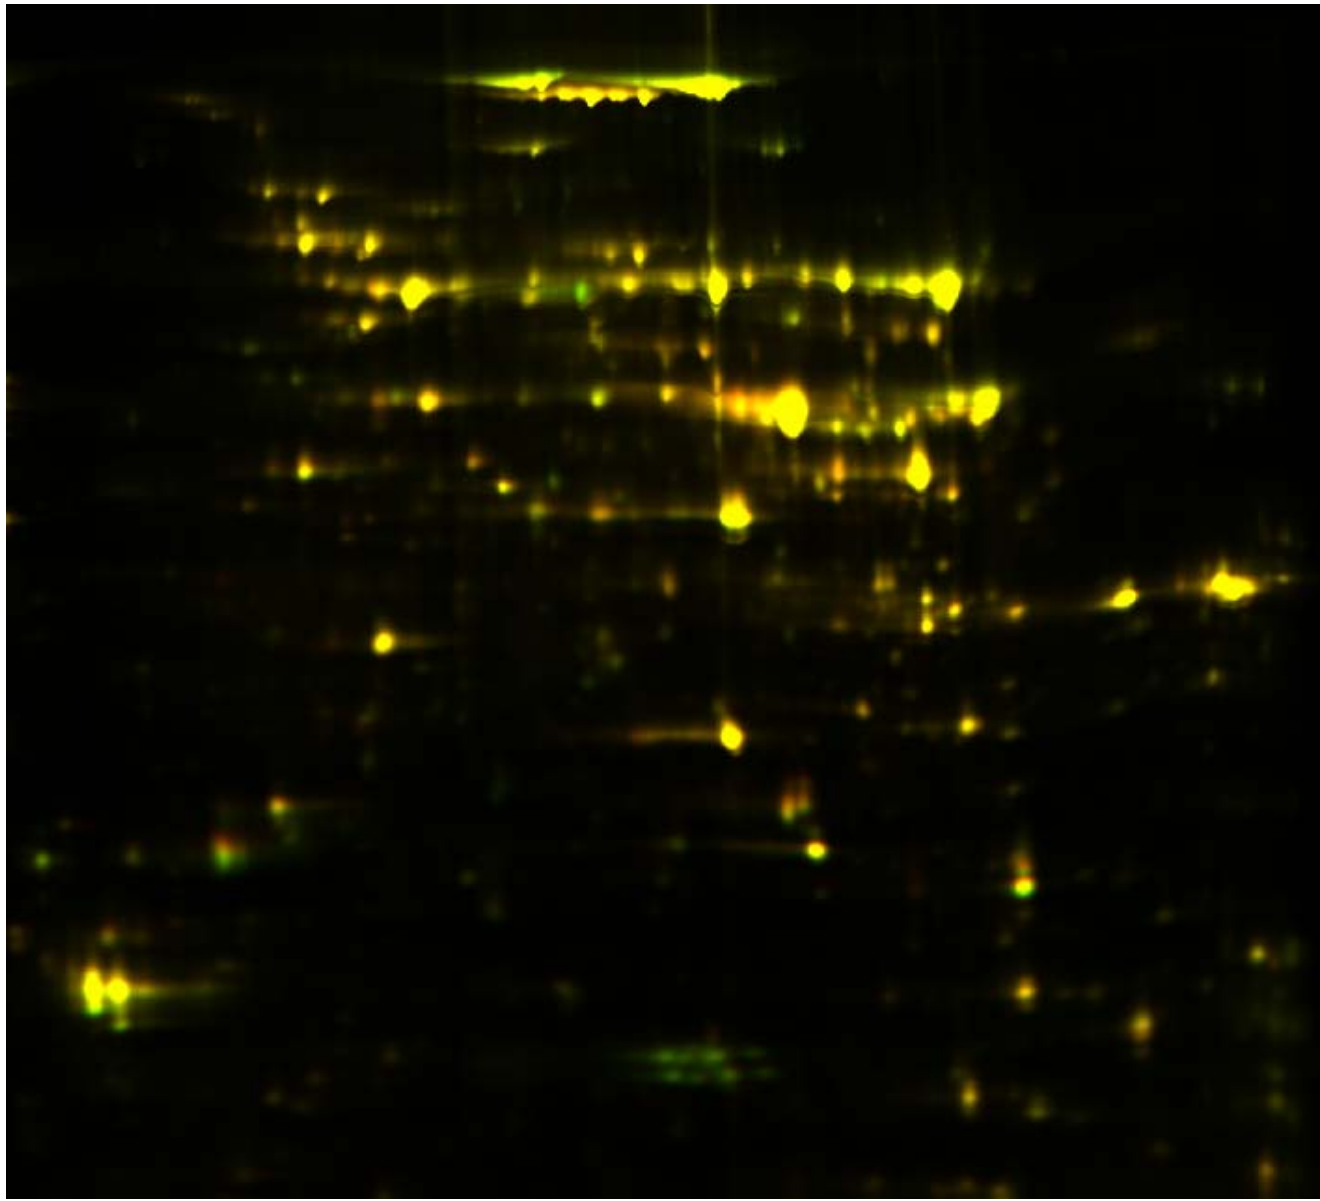

Green: 20 h

Red: 2 h

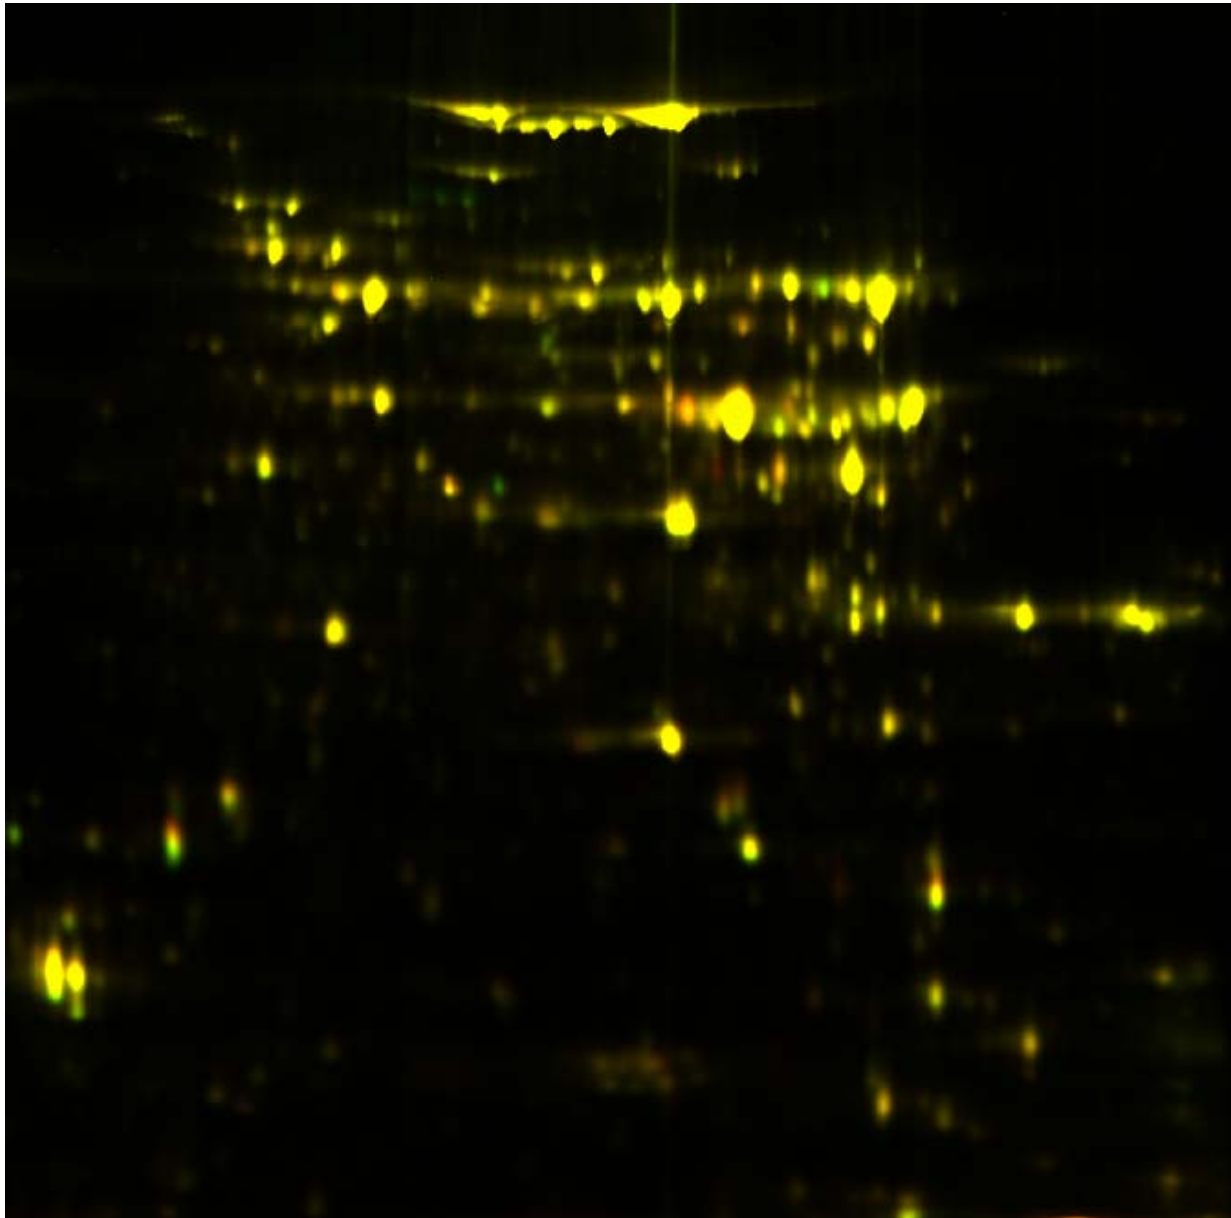

Green: 12 h

Red: 0 h

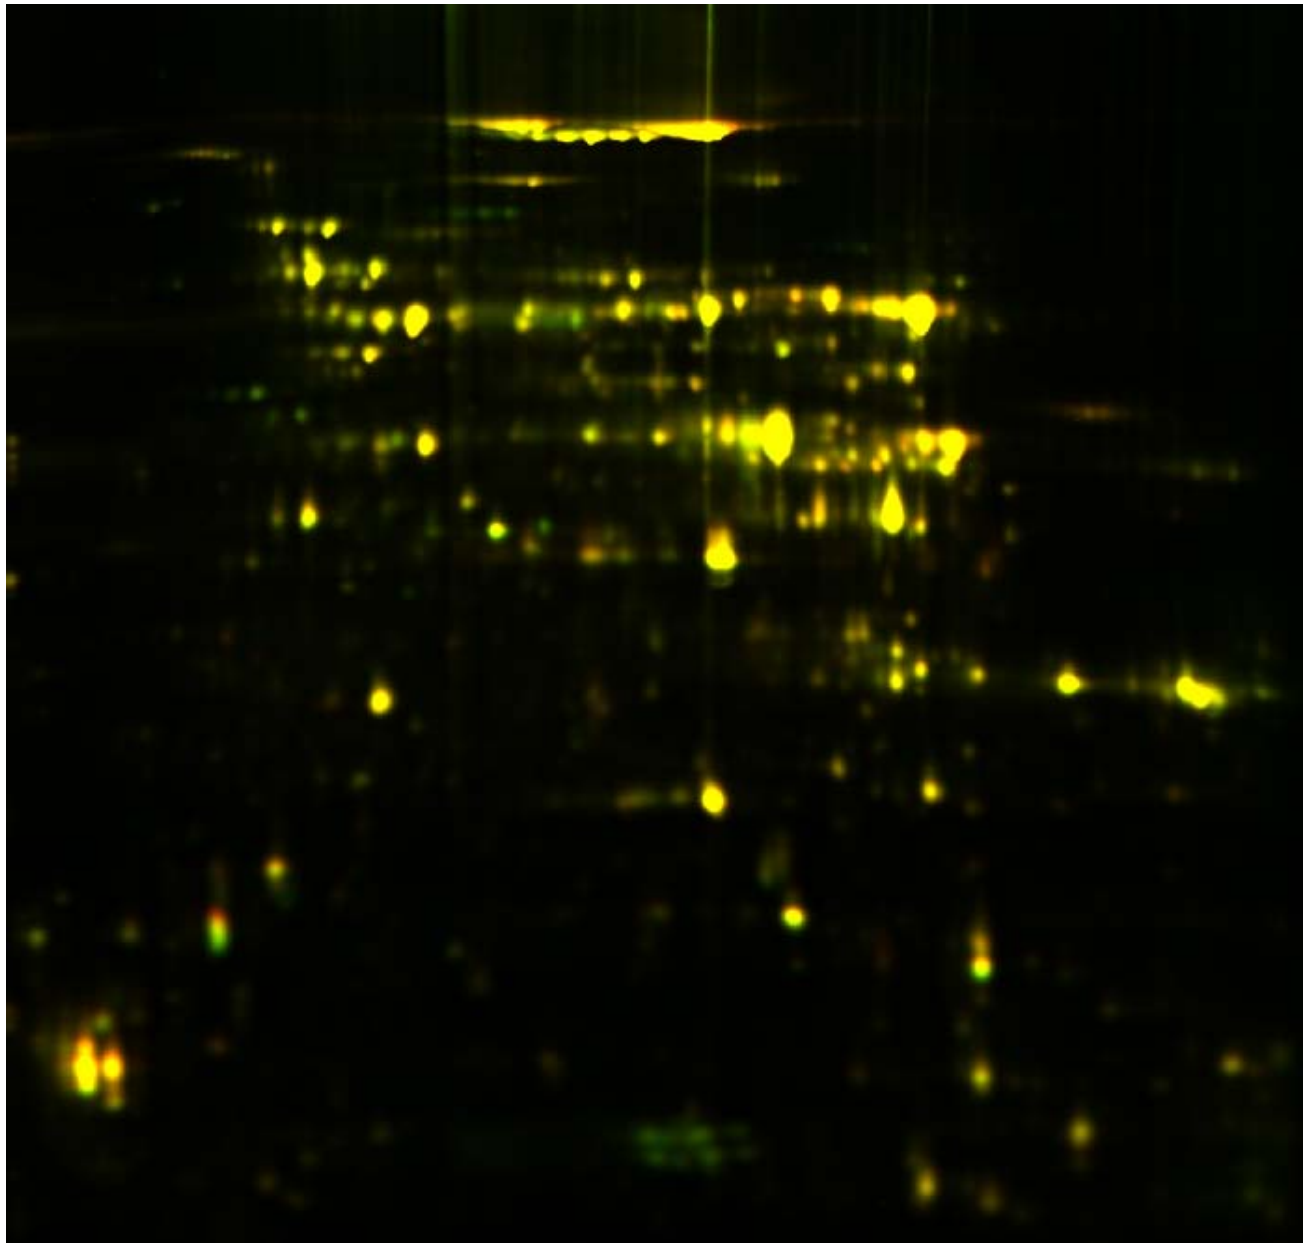

Green: 16 h

Red: 4 h



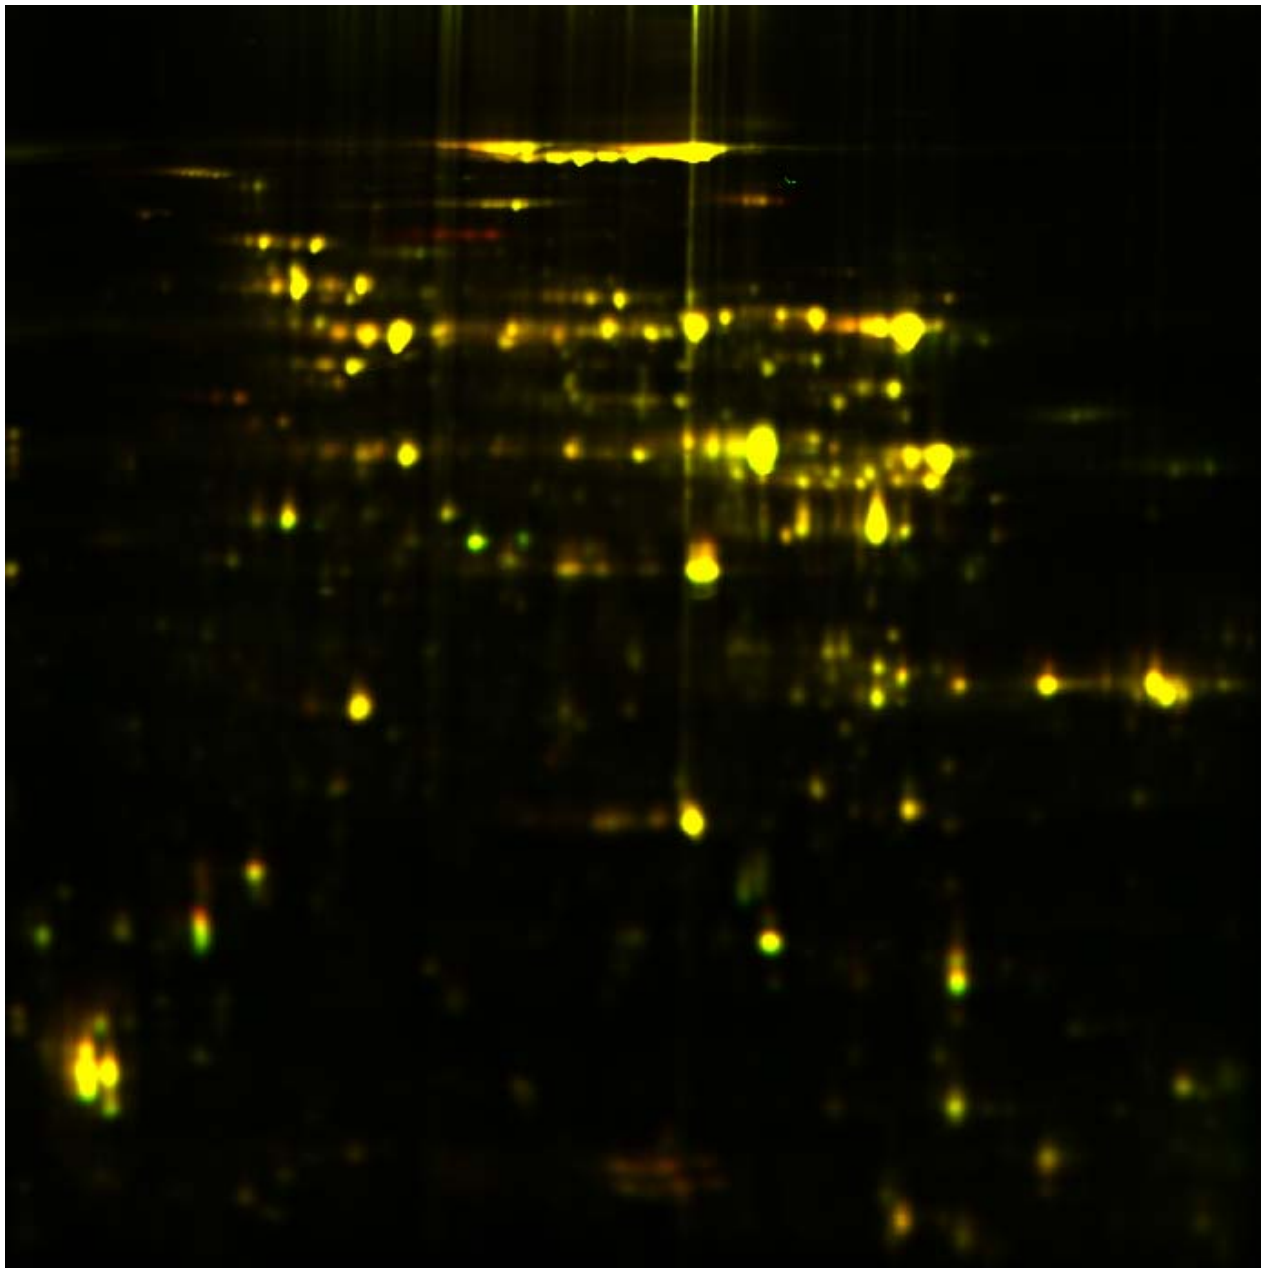

Green: 4 h

Red: 13 h

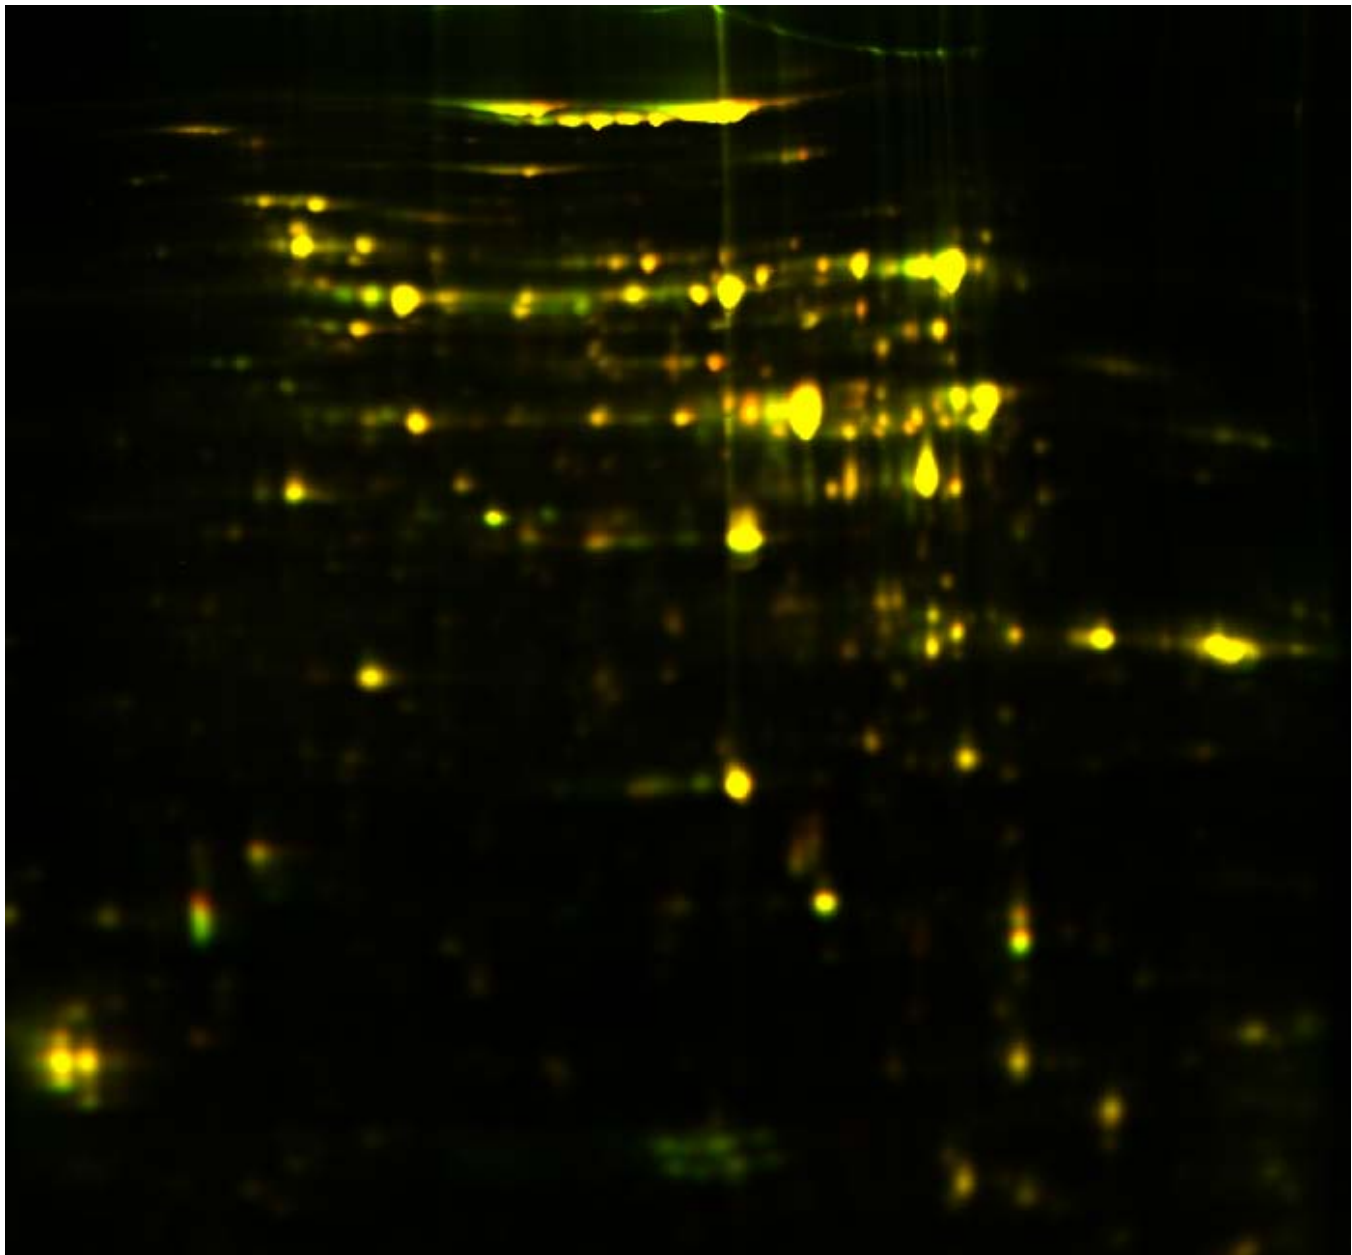

Green: 14 h

Red: 8 h

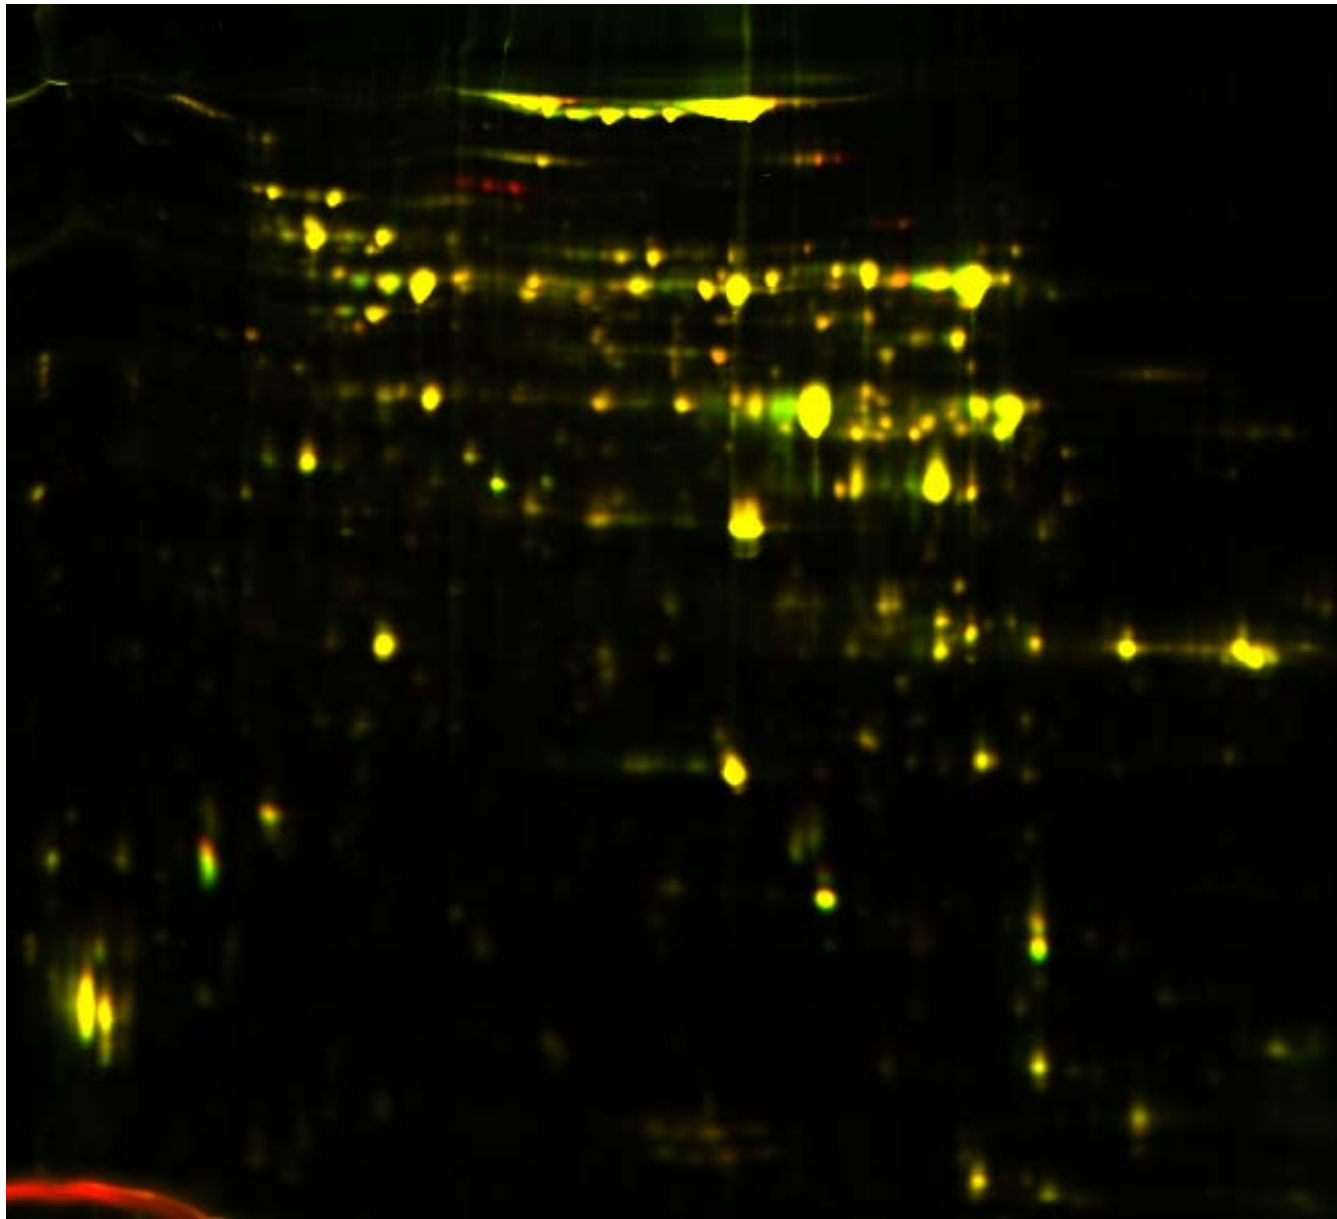

Green: 4 h

Red: 12 h

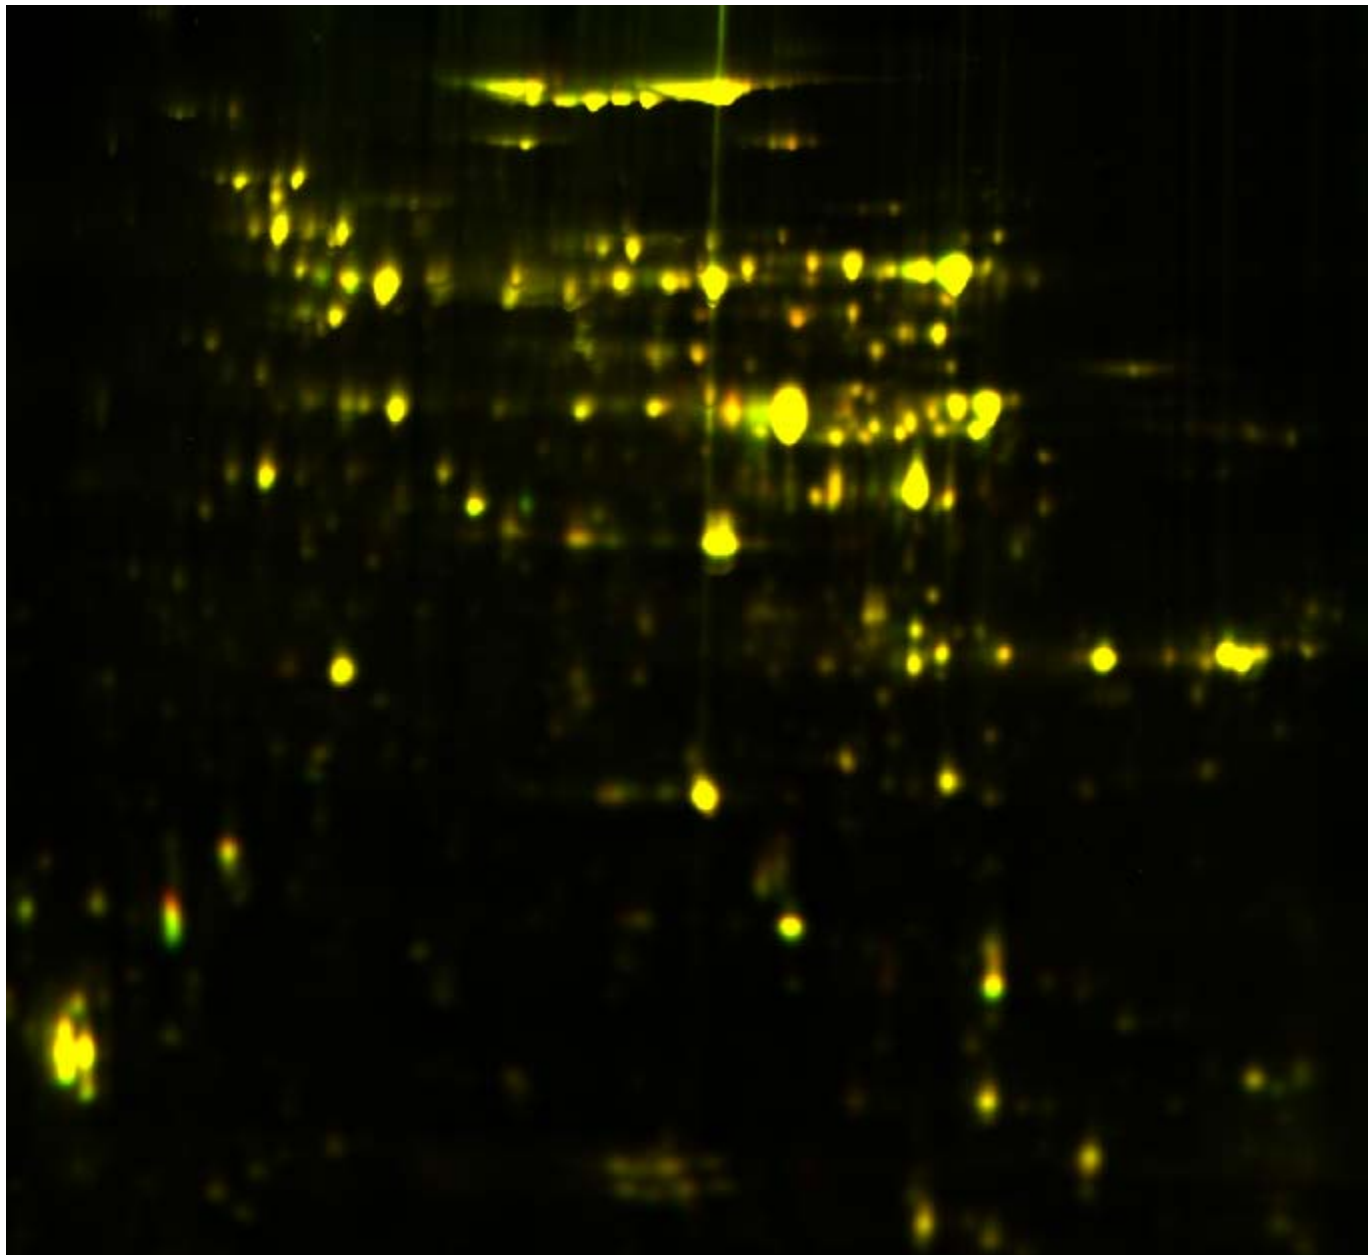

Green: 0 h

Red: 20 h

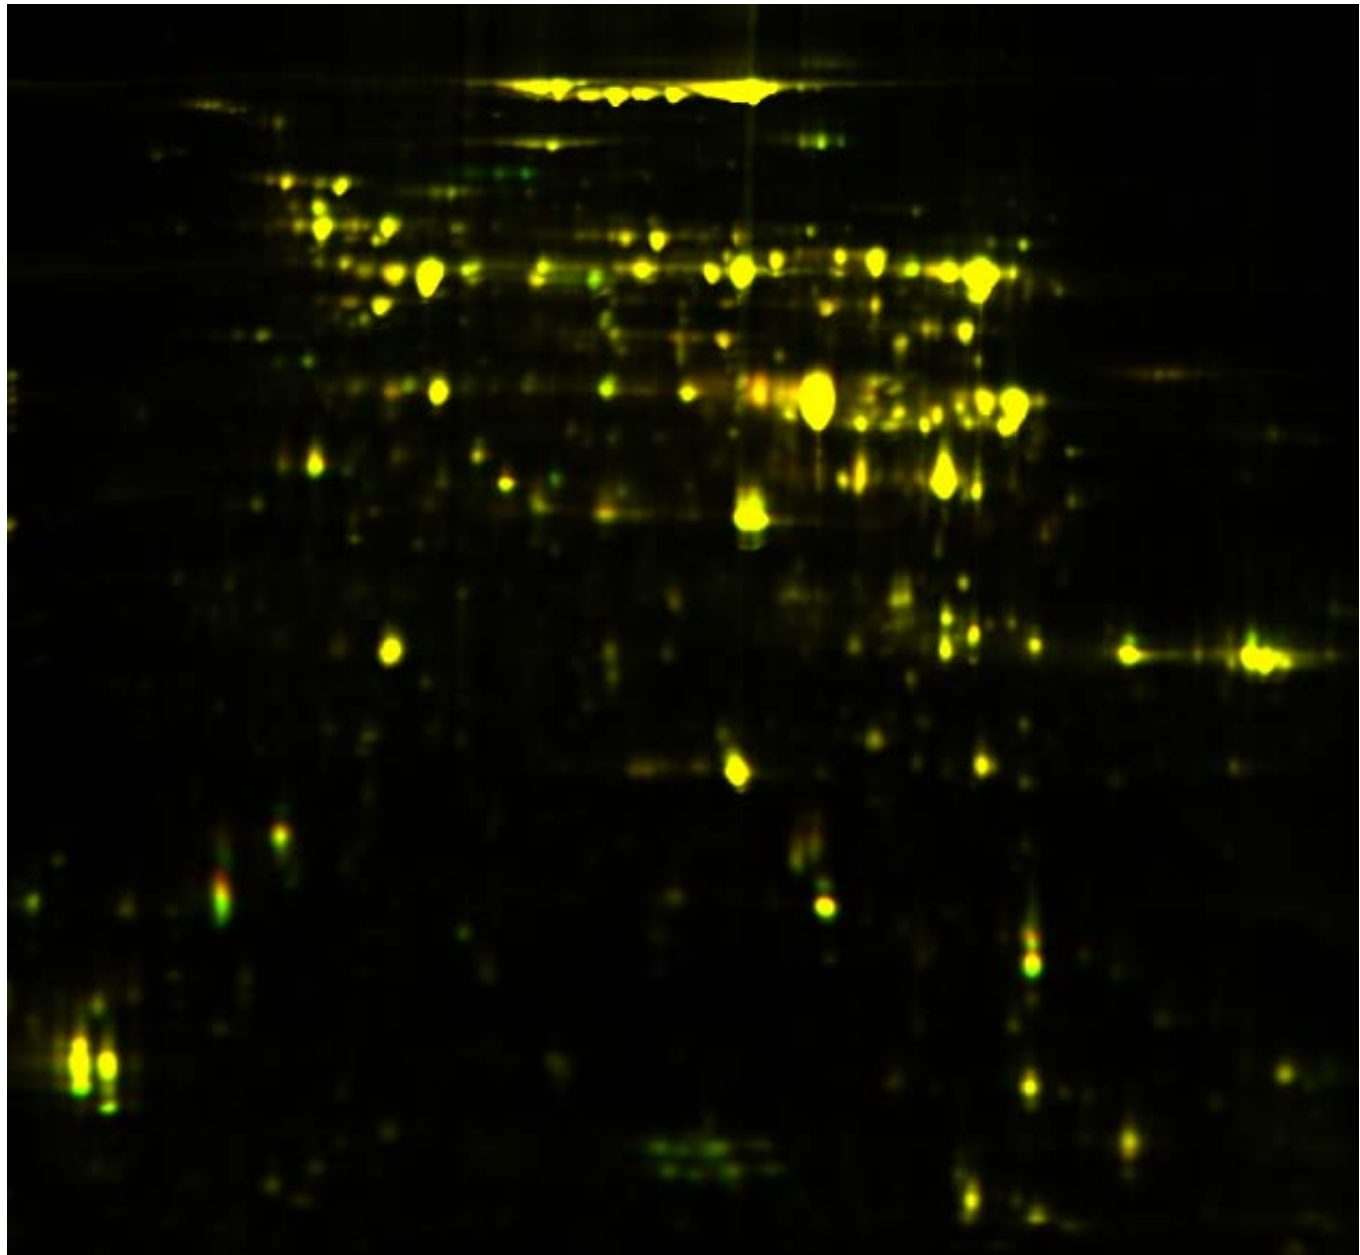

Green: 13 h

Red: 1 h

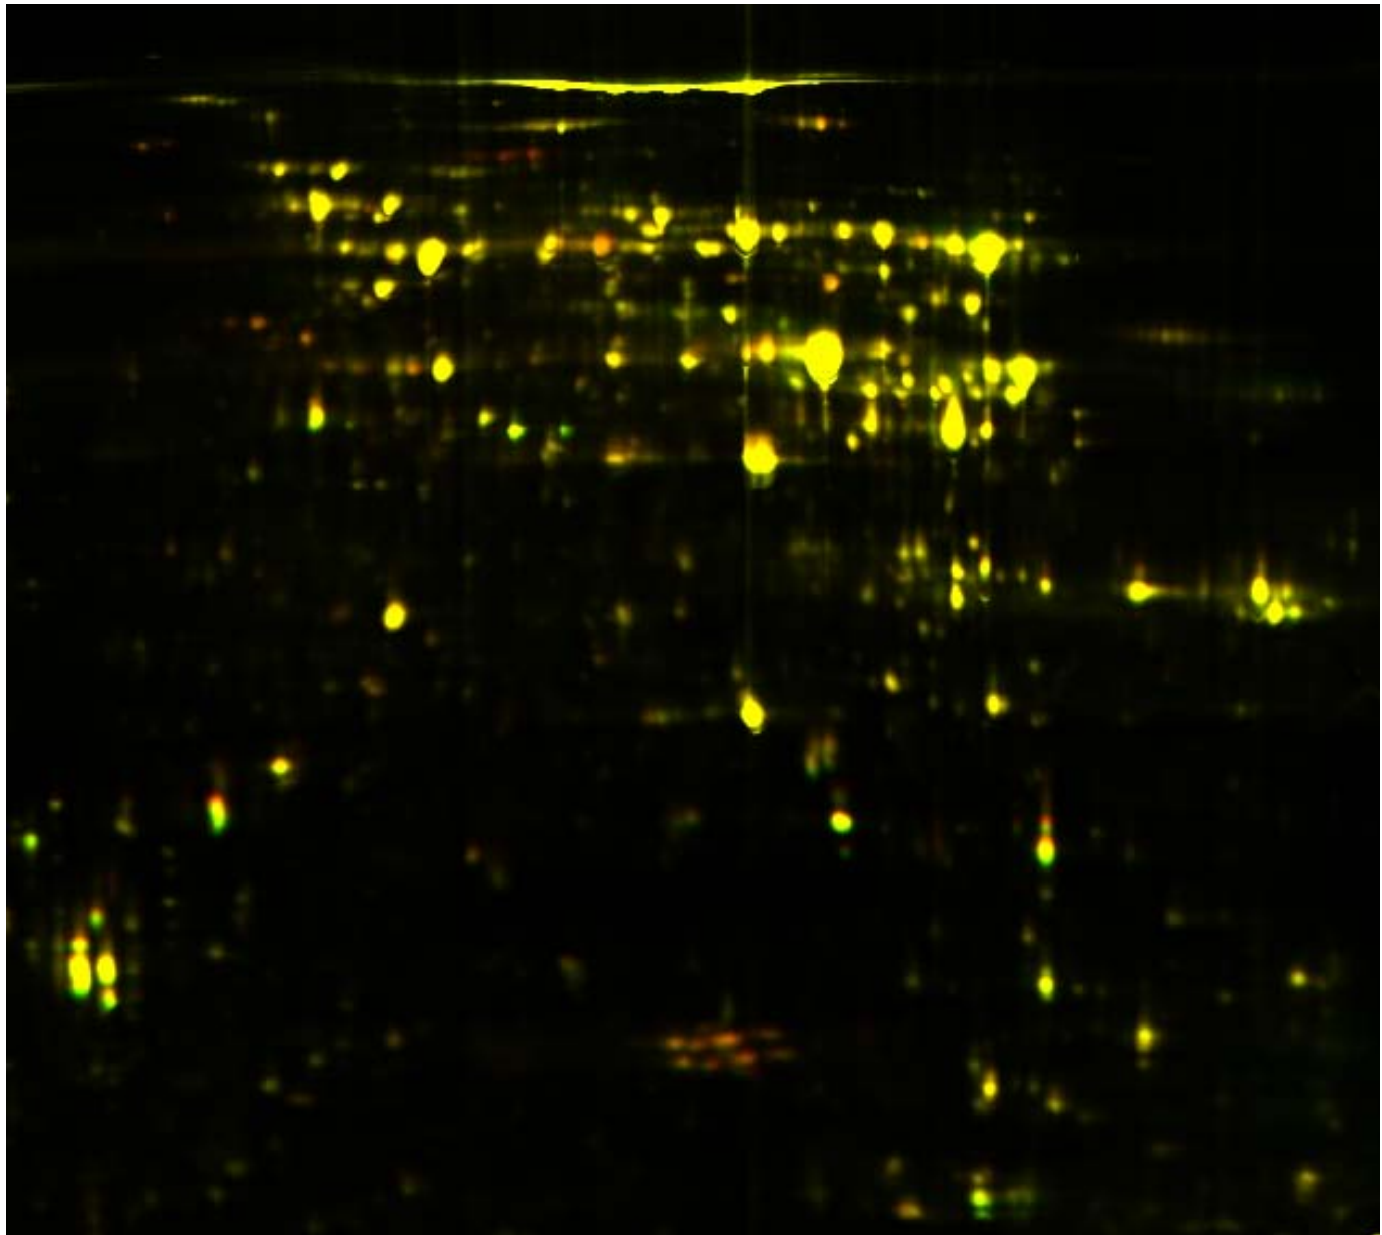

Green: 2 h

Red: 14 h

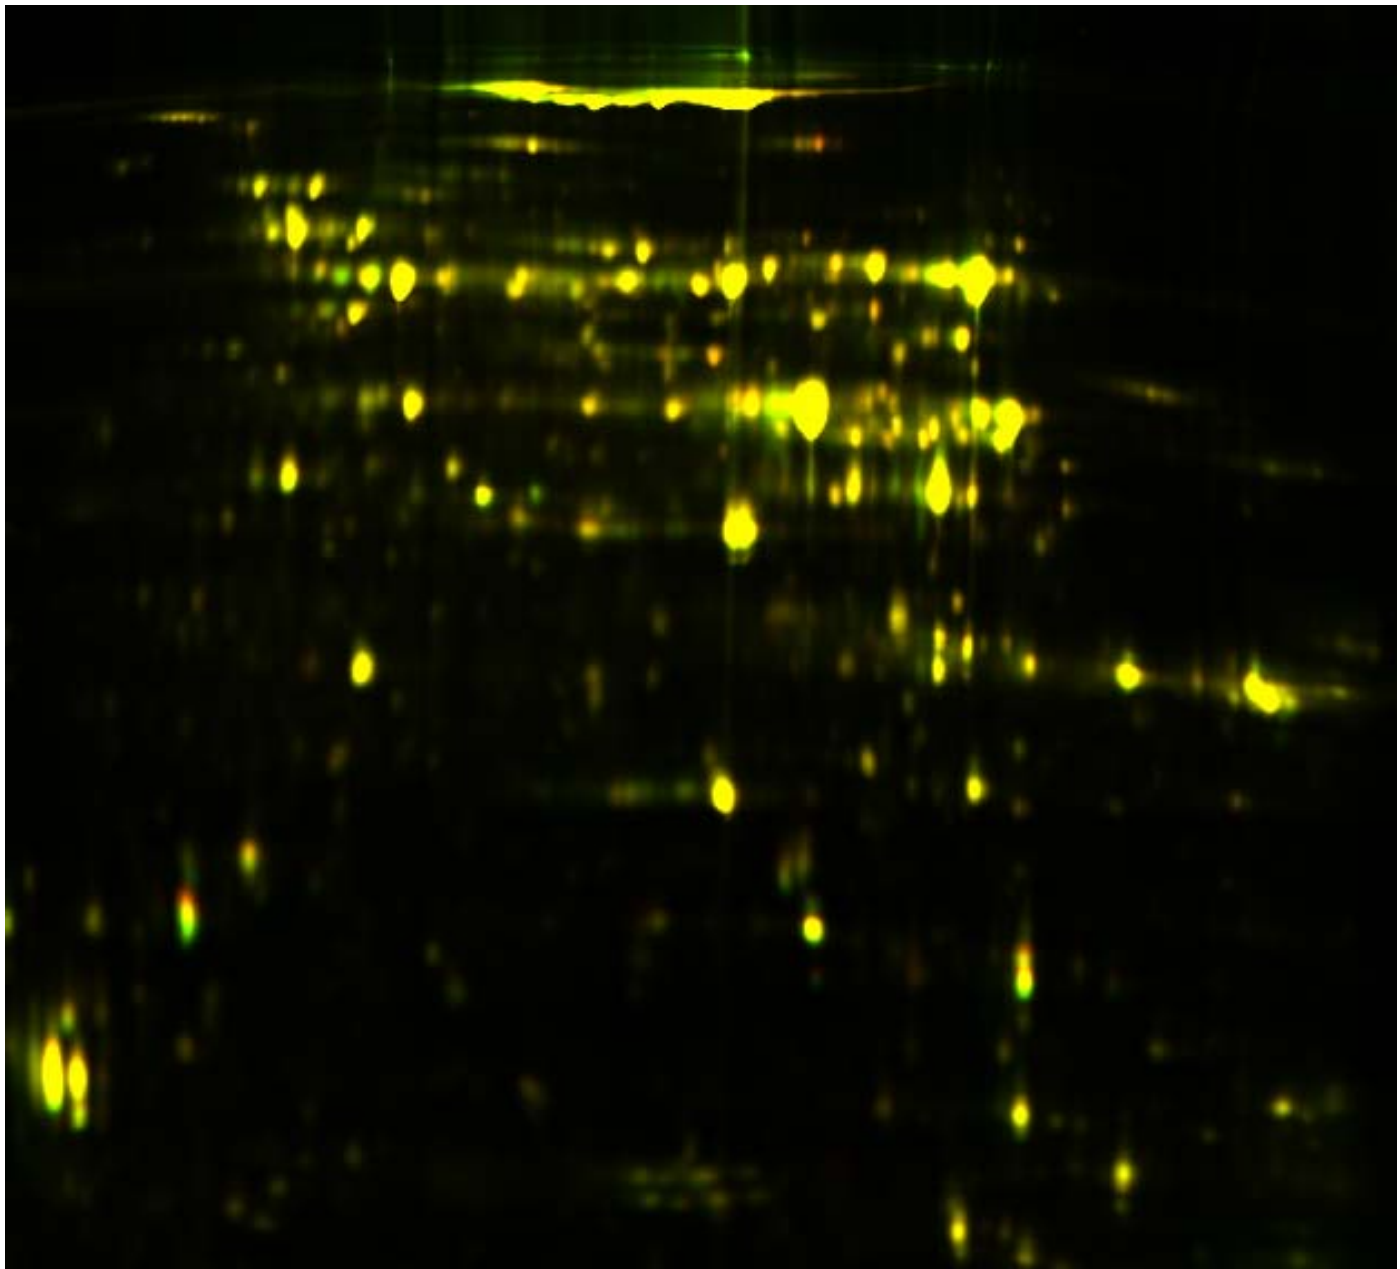

Green: 1 h

Red: 8 h

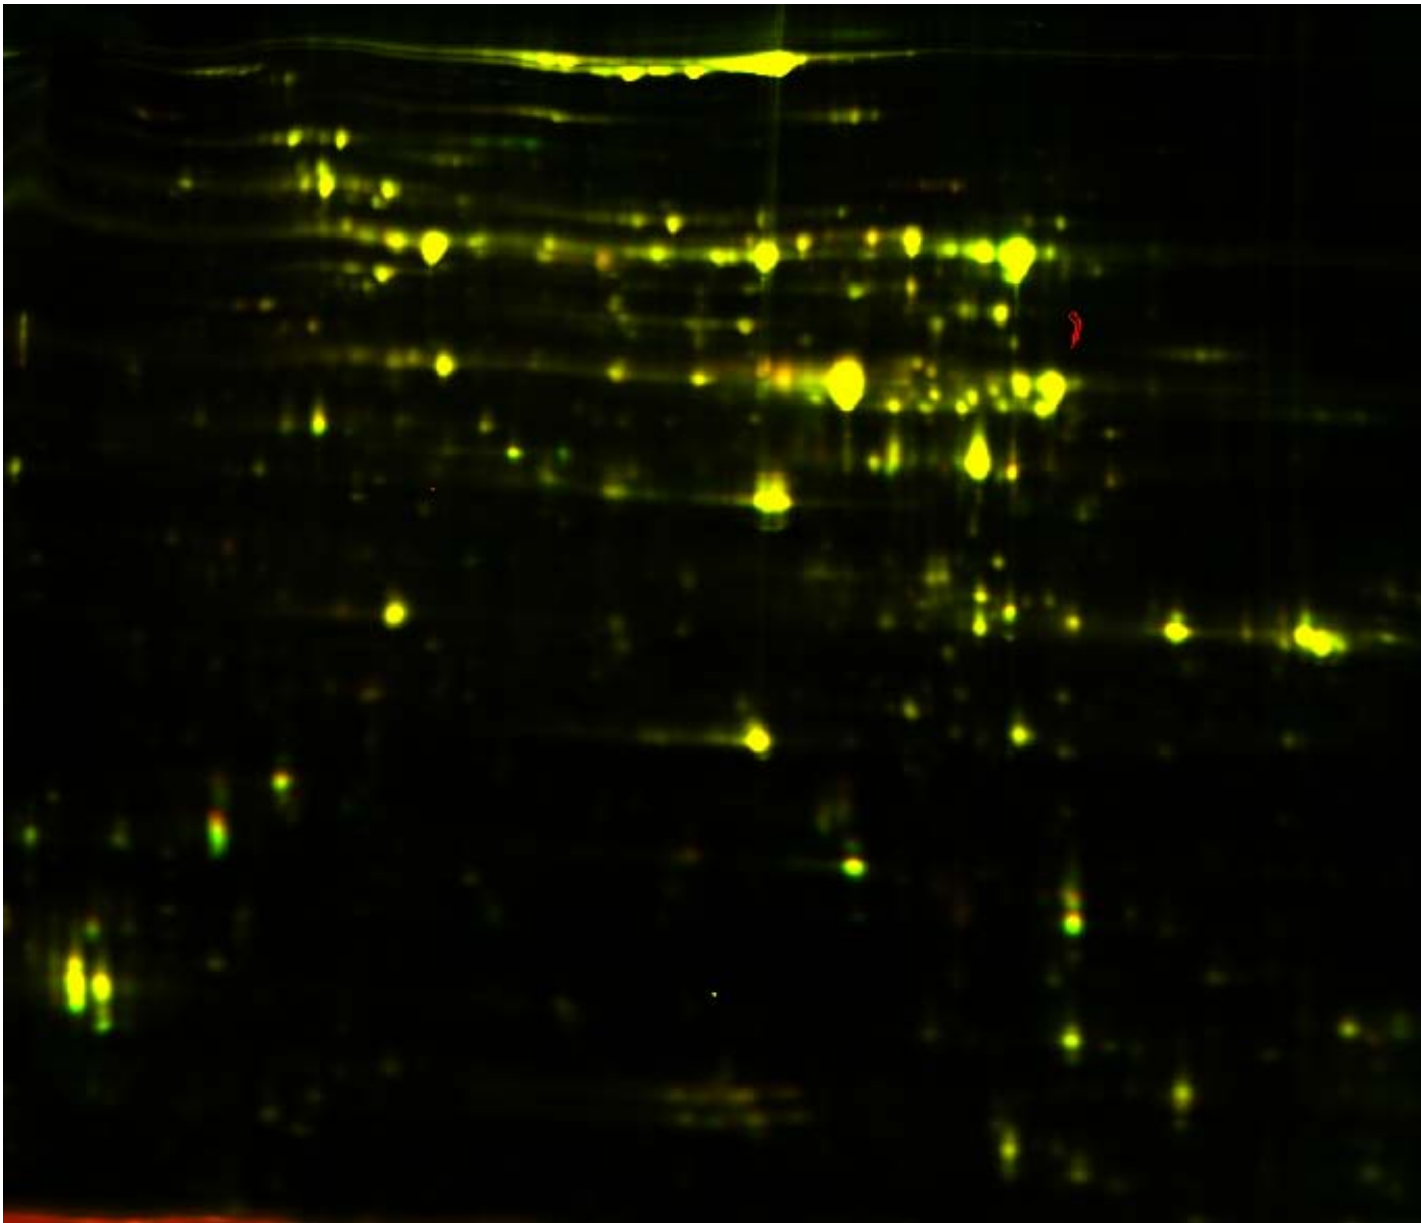

Green: 12 h

Red: 20 h



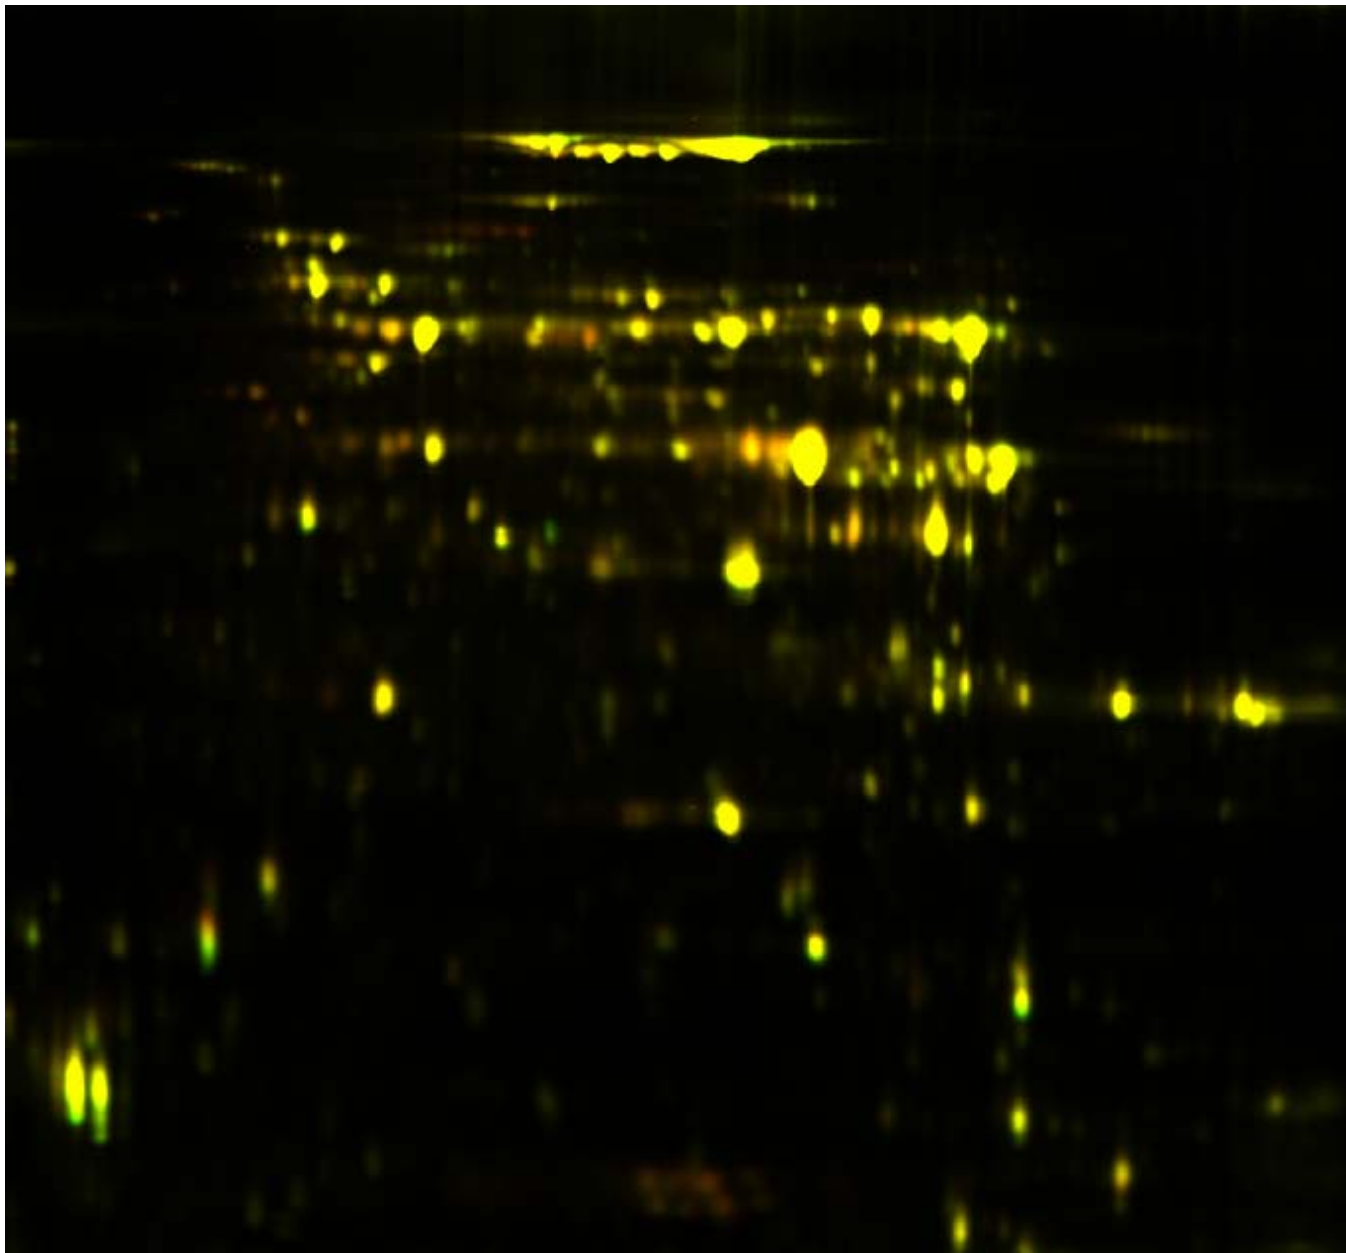

Green: 8 h

Red: 16 h
