# Supplementary material
Source: PubMed Central journal article supplement (PMC2953910)
Supplement: supp_M110.001214_mcp.M110.001214-2.pdf [file supp_M110.001214_mcp.M110.001214-2.pdf]

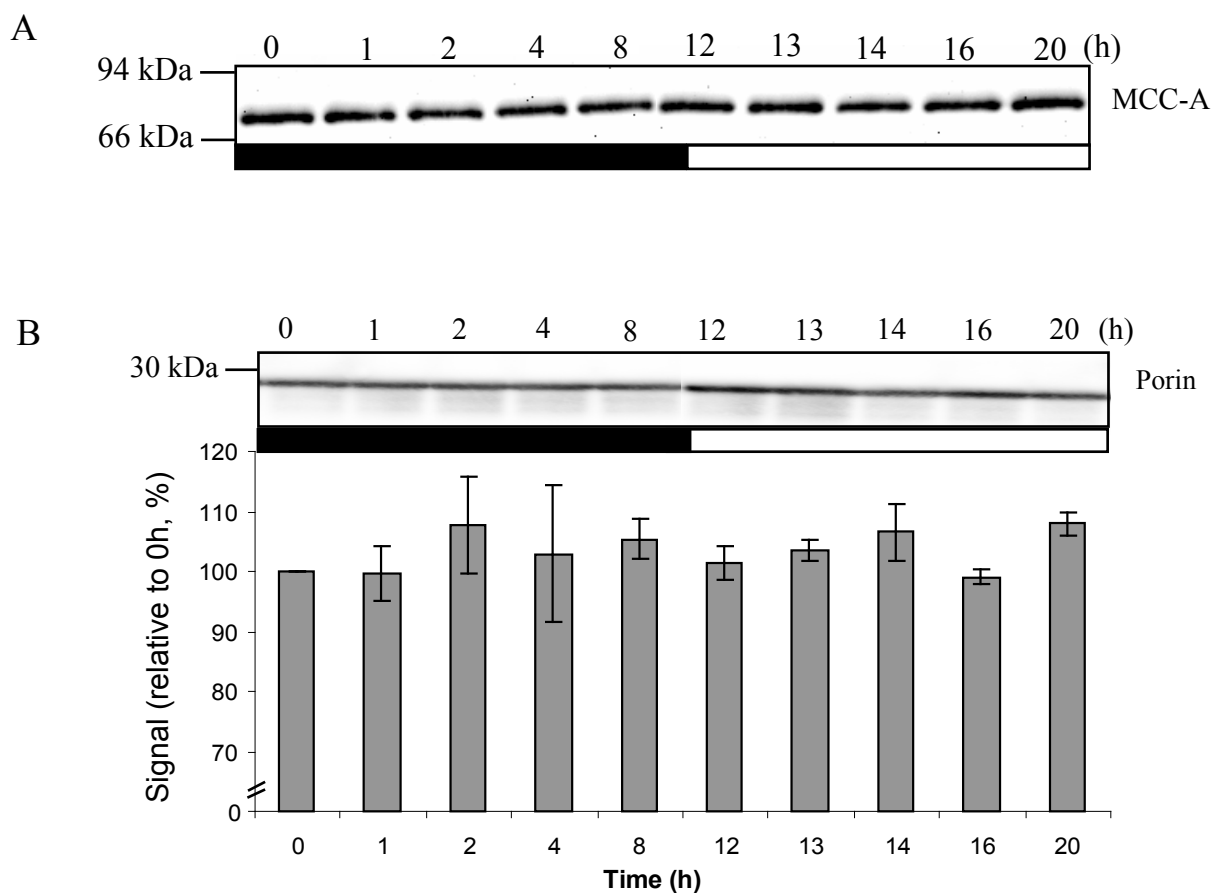

**Supplementary Figure 2. Changes in protein abundances in mitochondria during the diurnal cycle.** Immunoreactivity analysis of (A) MCCA protein abundance and (B) porin protein abundance using specific antibodies. Equal amounts of protein were loaded in each lane (15 ug). The intensity of the protein bands was quantified by ImageQuant 7 (GE Healthcare) and calculated as a percentage relative to 0-hr and plotted with means and SE from 3 biological replicates.
