# Supplementary material
Source: PubMed Central journal article supplement (PMC2953910)
Supplement: supp_M110.001214_mcp.M110.001214-3.pdf [file supp_M110.001214_mcp.M110.001214-3.pdf]

Precursor M/Z: 891.84 (2+) Resolution: 1.32 Filename: Cmpd 131, +MSn(892.4), 6.8 min  
Sequence: VISELGDSAFEDQCGR - Carbamidomethyl (C)  
Mr (experimental): 1781.66  
Mr (predicted): 1781.78  
Mass error: -0.12  
Mascot Ion Score: 88  
Expect Value: 3.7e-07

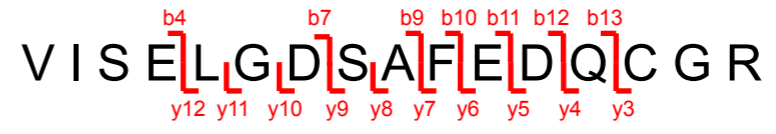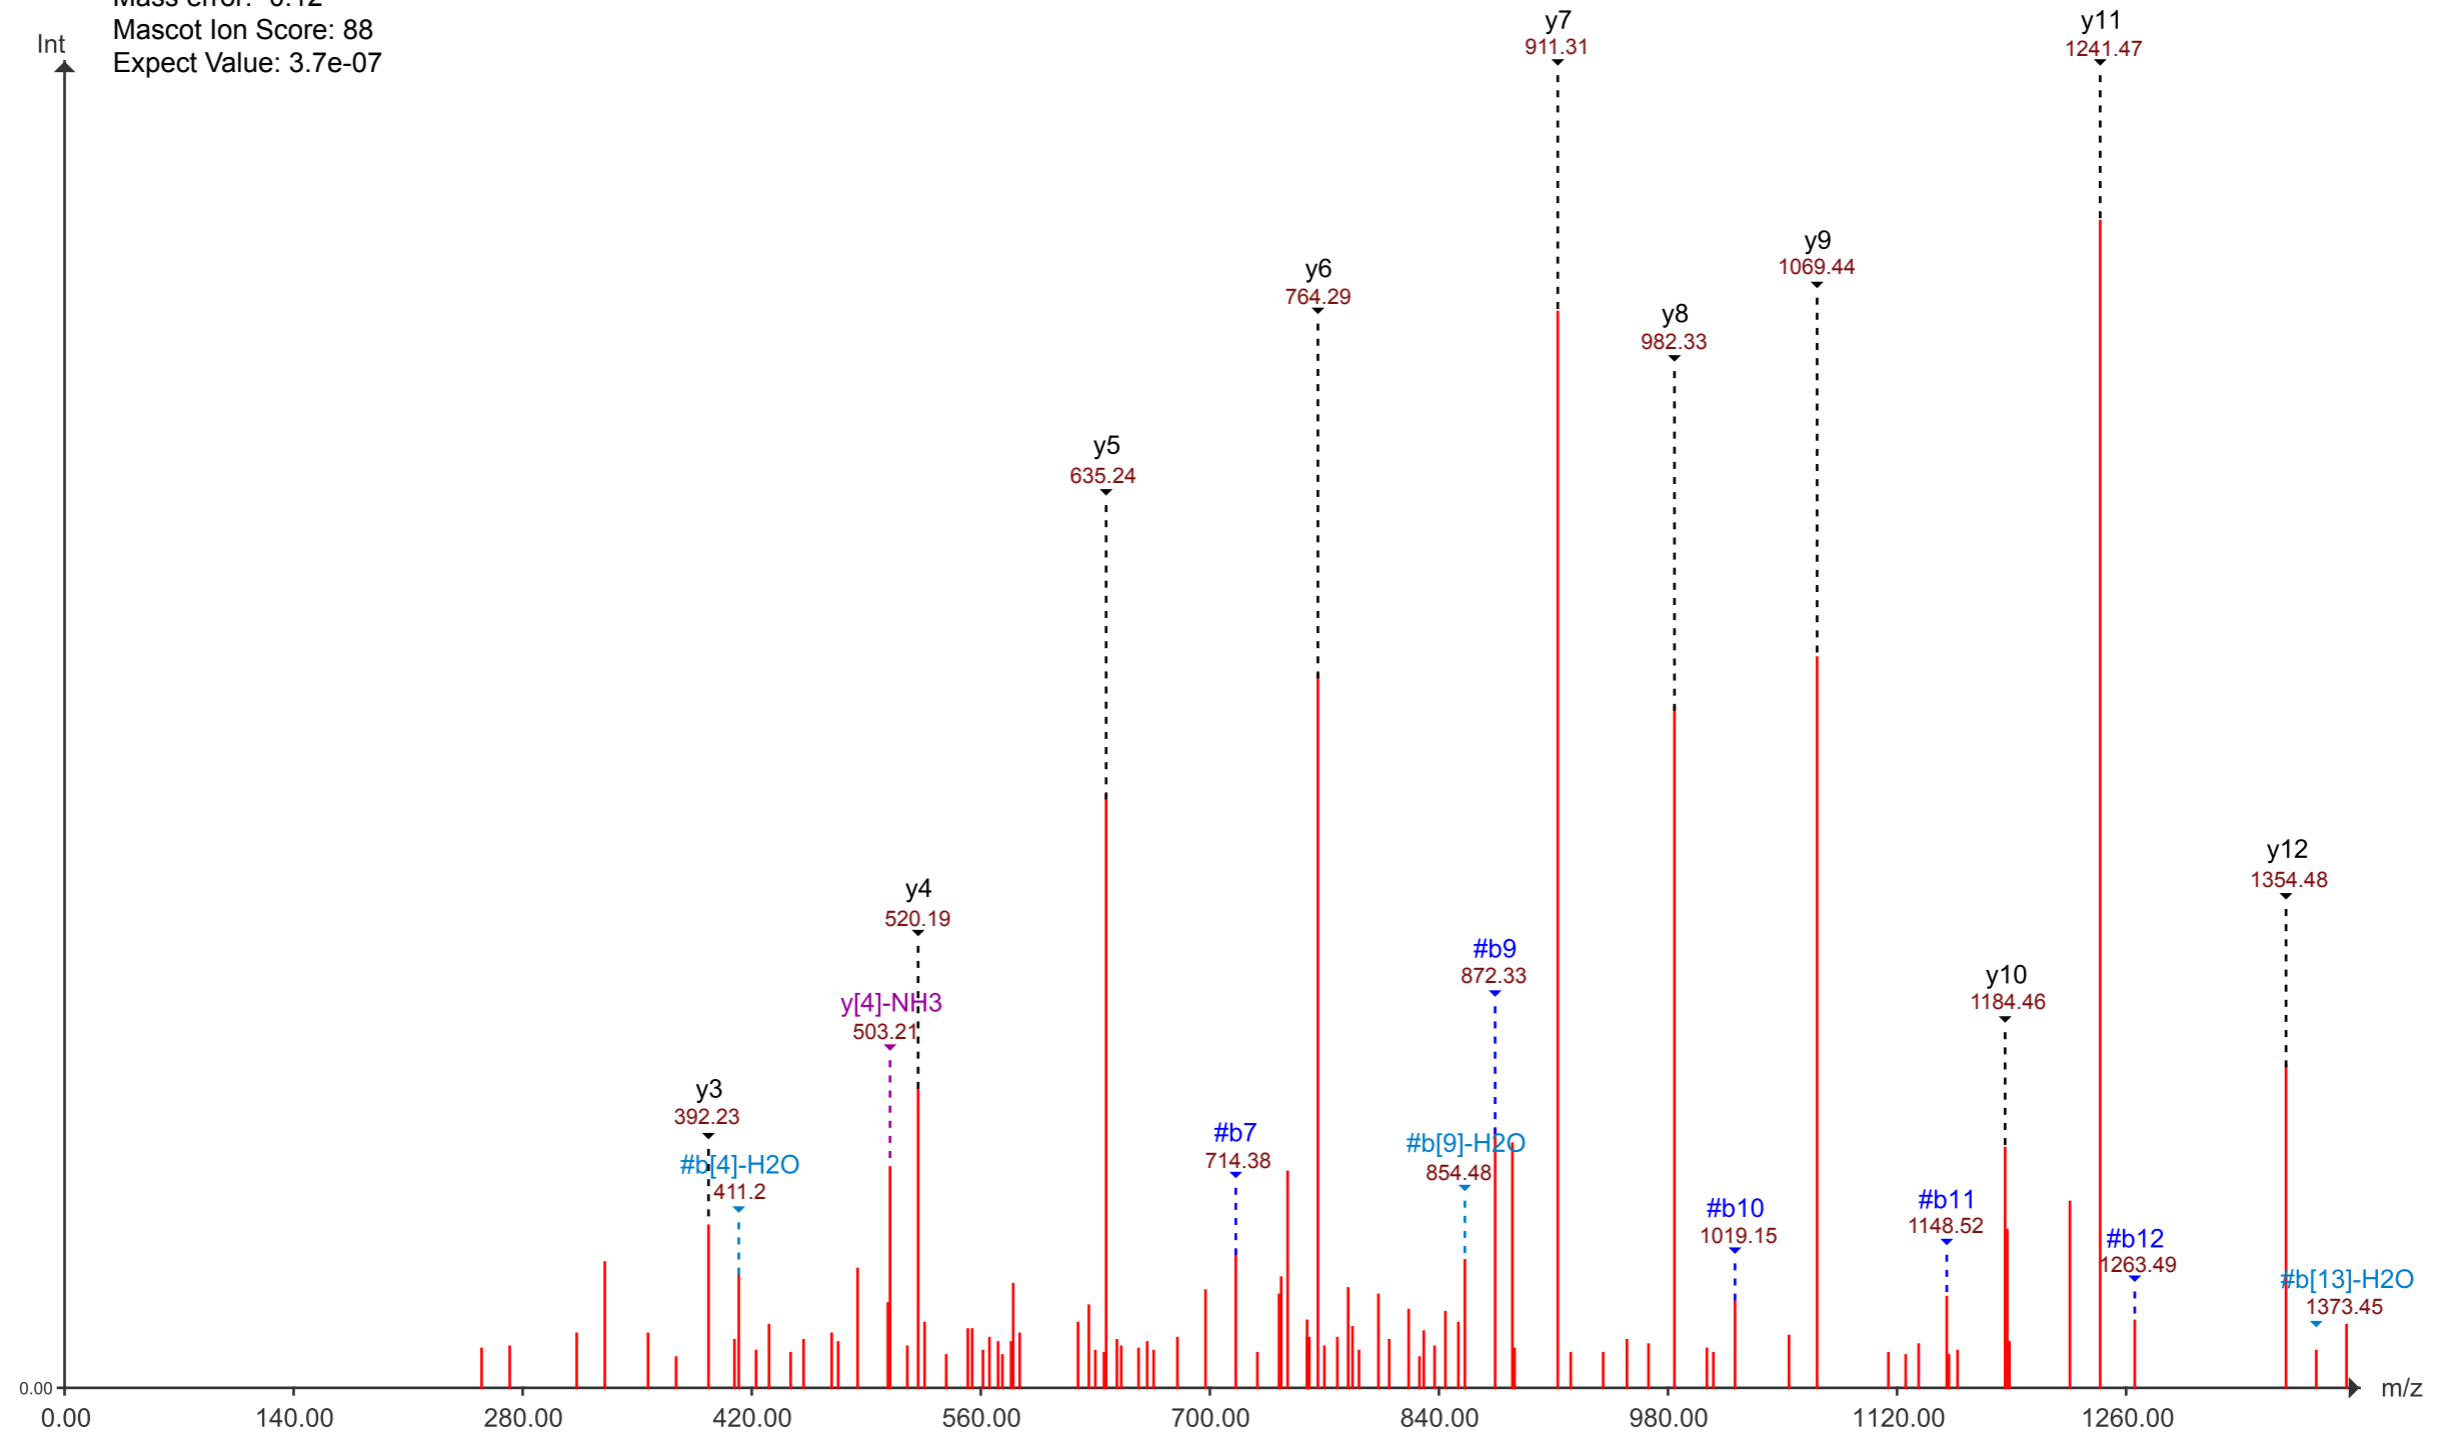

Supplementary Figure 3. An anotated spectrum of Spot 51.
