# Supplementary material
Source: PubMed Central journal article supplement (PMC2953910)
Supplement: supp_M110.001214_mcp.M110.001214-4.pdf [file supp_M110.001214_mcp.M110.001214-4.pdf]

**Supplementary Table 1. Identification by tandem mass spectrometry of protein spots from DIGE gels that change in abundance over the diurnal timecourse**

Identities of proteins were determined by tandem mass spectrometry (MS), the predicted molecular weight (MW) and isoelectric point (pI) of the matched protein and the gel sample are shown along with the MOWSE score (p<0.05 when score>38), number of independent, non-redundant peptides matched to tandem mass spectra and the percentage coverage of the matched sequence. The putative subcellular localization of each protein was determined based on the data from SUBA II (<http://www.suba.plantenergy.uwa.edu.au>). Spot numbers correspond to protein spots in Supplementary Figure 1B.

| Spot no.           | Gene locus | Protein Identity                                                 | Functional category                  | Score <sup>§</sup> | No. of unique peptides matched | % coverage | MM matched | pI matched | MM gel | pI gel | One-way Annona p-value | Known subcellular localization <sup>#</sup> |
|--------------------|------------|------------------------------------------------------------------|--------------------------------------|--------------------|--------------------------------|------------|------------|------------|--------|--------|------------------------|---------------------------------------------|
| 1                  | At4g26970  | Aconitase (ACON-2)                                               | TCA cycle                            | 633                | 14                             | 17%        | 108427     | 6.71       | 94000  | 6.0    | 0.0412                 | M                                           |
| 2                  | At4g26970  | Aconitase (ACON-2)                                               | TCA cycle                            | 839                | 17                             | 21%        | 108427     | 6.71       | 94000  | 6.1    | 0.0472                 | M                                           |
| 3                  | At4g33010  | Glycine decarboxylase P-protein (GDP-1)                          | Photorespiration                     | 642                | 15                             | 15%        | 112853     | 6.51       | 94000  | 6.5    | 0.0315                 | M                                           |
| 4                  | At4g33010  | Glycine decarboxylase P-protein (GDP-1)                          | Photorespiration                     | 322                | 7                              | 6%         | 112853     | 6.51       | 94000  | 6.6    | 0.0004 **              | M                                           |
| 5                  | At4g33010  | Glycine decarboxylase P-protein (GDP-1)                          | Photorespiration                     | 276                | 6                              | 6%         | 112853     | 6.51       | 94000  | 6.7    | 0.0020 **              | M                                           |
| 6                  | At4g33010  | Glycine decarboxylase P-protein (GDP-1)                          | Photorespiration                     | 210                | 4                              | 4%         | 112853     | 6.51       | 94000  | 6.8    | 0.0004 **              | M                                           |
| 13                 | At1g54220  | Pyruvate dehydrogenase (E2 subunit)                              | TCA cycle                            | 367                | 6                              | 13%        | 58431      | 7.95       | 59000  | 5.6    | 0.0015 **              | M                                           |
| 14                 | At1g03090  | Methylcrotonyl-CoA carboxylase alpha subunit (MCC-alpha)         | Branched-chain amino acid catabolism | 488                | 8                              | 14%        | 80401      | 6.42       | 71000  | 6.7    | 0.0304                 | M                                           |
| 15                 | At1g03090  | Methylcrotonyl-CoA carboxylase alpha subunit (MCC-alpha)         | Branched-chain amino acid catabolism | 862                | 13                             | 24%        | 80401      | 6.42       | 71000  | 6.8    | 2.76E-05 **            | M                                           |
| 16                 | At1g03090  | Methylcrotonyl-CoA carboxylase alpha subunit (MCC-alpha)         | Branched-chain amino acid catabolism | 602                | 10                             | 18%        | 80401      | 6.42       | 71000  | 6.8    | 0.0001 **              | M                                           |
| 17                 | At1g03090  | Methylcrotonyl-CoA carboxylase alpha subunit (MCC-alpha)         | Branched-chain amino acid catabolism | 361                | 5                              | 10%        | 80401      | 6.42       | 71000  | 6.9    | 3.40E-07 **            | M                                           |
| 19                 | At1g09300  | Metallopeptidase M24 family protein                              | Protein processing                   | 261                | 5                              | 10%        | 54947      | 6.94       | 51000  | 6.1    | 5.65E-09 **            | M/C/N                                       |
| 20                 | At3g48000  | Aldehyde dehydrogenase 2                                         | Stress defense                       | 530                | 9                              | 21%        | 58552      | 7.11       | 53000  | 6.4    | 0.0041 **              | M                                           |
| 21                 | At2g43400  | Electron-transfer flavoprotein:ubiquinone oxidoreductase (ETFQO) | Branched-chain amino acid catabolism | 350                | 5                              | 9%         | 70084      | 7.31       | 59000  | 6.7    | 0.0029 **              | M                                           |
| 22                 | At1g48030  | Dihydrolipoamide dehydrogenase (PDC-E3 protein & GDC L-protein)  | TCA cycle and photorespiration       | 580                | 9                              | 22%        | 53954      | 6.96       | 55000  | 7.0    | 0.0029 **              | M                                           |
| 23                 | At4g37930  | Serine hydroxymethyltransferase (SHMT1)                          | Photorespiration                     | 401                | 7                              | 14%        | 57364      | 8.13       | 55000  | 7.3    | 1.35E-05 **            | M                                           |
| 24                 | At4g34030  | Methylcrotonyl-CoA carboxylase beta subunit (MCC-beta)           | Branched-chain amino acid catabolism | 477                | 9                              | 17%        | 63972      | 8.78       | 58000  | 8.0    | 6.74E-05 **            | M                                           |
| 25                 | At4g37930  | Serine hydroxymethyltransferase (SHMT1)                          | Photorespiration                     | 582                | 11                             | 24%        | 57364      | 8.13       | 55000  | 7.9    | 0.0008 **              | M                                           |
| 26                 | At3g06850  | Branched chain alpha-ketoacid dehydrogenase complex              | Branched-chain amino acid catabolism | 543                | 10                             | 22%        | 52673      | 6.29       | 50000  | 5.2    | 0.0030 **              | M                                           |
| 29                 | At2g20420  | Succinyl-CoA synthetase beta subunit                             | TCA cycle                            | 630                | 11                             | 26%        | 45317      | 6.30       | 44000  | 5.2    | 0.0074                 | M                                           |
| 31                 | At3g02090  | Metallopeptidase beta subunit                                    | Protein processing                   | 195                | 4                              | 6%         | 59123      | 6.30       | 42000  | 5.3    | 0.0457                 | M                                           |
| 35                 | At3g59760  | O-acetylserine (thiol)-lyase isoform C (OAS-TL-C)                | Carbon / nitrogen assimilation       | 514                | 11                             | 25%        | 45786      | 8.39       | 40000  | 5.7    | 0.0026 **              | M                                           |
| 36                 | At1g53240  | Malate dehydrogenase (MDH-2)                                     | TCA cycle                            | 400                | 5                              | 19%        | 35782      | 8.54       | 38000  | 6.2    | 0.0141                 | M                                           |
| 37                 | At2g44350  | Citrate synthase                                                 | TCA cycle                            | 194                | 3                              | 6%         | 52621      | 6.41       | 49000  | 6.3    | 0.0355                 | M                                           |
| 38                 | At2g44350  | Citrate synthase                                                 | TCA cycle                            | 114                | 2                              | 6%         | 52621      | 6.41       | 49000  | 6.4    | 0.0178                 | M                                           |
| 39                 | At5g14780  | Formate dehydrogenase                                            | Folate metabolism                    | 212                | 5                              | 10%        | 42383      | 7.12       | 43000  | 6.4    | 0.0468                 | M                                           |
| 40                 | At5g14780  | Formate dehydrogenase                                            | Folate metabolism                    | 319                | 7                              | 14%        | 42383      | 7.12       | 43000  | 6.4    | 0.0170                 | M                                           |
| 41                 | At1g59900  | Pyruvate dehydrogenase (E1-alpha subunit)                        | TCA cycle                            | 616                | 13                             | 34%        | 43032      | 7.16       | 42000  | 6.6    | 0.0065                 | M                                           |
| 42                 | At5g07440  | Glutamate dehydrogenase - 2                                      | Carbon / nitrogen assimilation       | 323                | 6                              | 15%        | 44671      | 6.07       | 45000  | 6.7    | 0.0017 **              | M                                           |
| 43                 | At5g14780  | Formate dehydrogenase                                            | Folate metabolism                    | 730                | 16                             | 33%        | 42383      | 7.12       | 45000  | 6.8    | 0.0025 **              | M                                           |
| 44                 | At5g14780  | Formate dehydrogenase                                            | Folate metabolism                    | 546                | 11                             | 23%        | 42383      | 7.12       | 45000  | 6.9    | 0.0163                 | M                                           |
| 45                 | At3g09810  | isocitrate dehydrogenase (IDH-3)                                 | TCA cycle                            | 186                | 3                              | 9%         | 40550      | 6.71       | 39000  | 6.7    | 0.0014 **              | M                                           |
| 46                 | At3g22200  | Gamma aminobutyrate aminotransferase (GABA-T)                    | Carbon / nitrogen assimilation       | 262                | 5                              | 11%        | 55152      | 8.01       | 39000  | 6.8    | 0.0031 **              | M                                           |
| 47                 | At3g61440  | L-3-cyanoalanine synthase (CAS) / cysteine synthase              | Carbon / nitrogen assimilation       | 343                | 7                              | 22%        | 39902      | 8.71       | 39000  | 7.4    | 0.0083                 | M                                           |
| 50                 | At5g20080  | NADH-cytochrome b5 reductase                                     | Respiratory apparatus                | 109                | 2                              | 6%         | 35964      | 8.76       | 31000  | 7.2    | 0.0106                 | M                                           |
| 51                 | At3g01500  | Carbonic anhydrase 1                                             | Respiratory apparatus                | 88                 | 1                              | 5%         | 29485      | 5.54       | 29000  | 6.1    | 9.36E-07 **            | M                                           |
| 52                 | At3g06050  | Peroxioredoxin IIF                                               | Stress defense                       | 333                | 5                              | 26%        | 21432      | 8.99       | 23000  | 6.3    | 0.0440                 | M                                           |
| 54                 | At1g32470  | Glycine decarboxylase H-protein subunit 3                        | Photorespiration                     | 188                | 4                              | 27%        | 17886      | 5.11       | 19000  | 3.9    | 0.0191                 | M                                           |
| 55                 | At2g35370  | Glycine decarboxylase H-protein subunit 1                        | Photorespiration                     | 163                | 3                              | 20%        | 17936      | 5.24       | 19000  | 4.2    | 0.0005 **              | M                                           |
| Breakdown products |            |                                                                  |                                      |                    |                                |            |            |            |        |        |                        |                                             |
| 9                  | At2g26080  | Glycine decarboxylase P-protein (GDP-2)                          | Photorespiration                     | 163                | 3                              | 3%         | 113703     | 6.18       | 67000  | 5.6    | 0.0171                 | M                                           |
| 10                 | At4g33010  | Glycine decarboxylase P-protein (GDP-1)                          | Photorespiration                     | 289                | 5                              | 5%         | 112853     | 6.51       | 67000  | 5.7    | 0.0029 **              | M                                           |
| 11                 | At4g33010  | Glycine decarboxylase P-protein (GDP-1)                          | Photorespiration                     | 422                | 8                              | 8%         | 112853     | 6.51       | 67000  | 5.8    | 0.0014 **              | M                                           |
| 12                 | At2g26080  | Glycine decarboxylase P-protein (GDP-2)                          | Photorespiration                     | 245                | 5                              | 5%         | 113703     | 6.18       | 67000  | 6.0    | 0.0083                 | M                                           |
| 30                 | At5g08670  | ATP synthase beta subunit                                        | Respiratory apparatus                | 536                | 7                              | 17%        | 59634      | 6.18       | 43000  | 5.1    | 0.0013 **              | M                                           |
| 53                 | At5g14780  | Formate dehydrogenase                                            | Folate metabolism                    | 249                | 6                              | 11%        | 42383      | 7.12       | 22000  | 5.6    | 0.0467                 | M                                           |
| Contaminants       |            |                                                                  |                                      |                    |                                |            |            |            |        |        |                        |                                             |
| 7                  | At4g24280  | Chloroplast heat shock protein 70-1                              | Protein processing                   | 204                | 4                              | 6%         | 76461      | 5.07       | 71000  | 4.3    | 0.0002 **              | C                                           |
| 8                  | At2g28000  | Chaperonin 60A                                                   | Protein processing                   | 681                | 11                             | 22%        | 62034      | 5.09       | 60000  | 4.4    | 6.74E-05 **            | C                                           |
| 18                 | AtCg00490  | Rubisco                                                          | Photosynthesis                       | 507                | 10                             | 18%        | 52922      | 5.88       | 51000  | 6.0    | 0.01547                | C                                           |
| 27                 | At2g39730  | Rubisco activase                                                 | Photosynthesis                       | 478                | 8                              | 23%        | 51948      | 5.87       | 49000  | 4.8    | 2.82E-07 **            | C                                           |
| 28                 | At5g35630  | Glutamine synthase                                               | Carbon / nitrogen assimilation       | 142                | 3                              | 6%         | 47381      | 6.43       | 46000  | 5.0    | 2.31E-06 **            | M/C                                         |
| 32                 | At4g13360  | 3-hydroxyisobutyryl-coenzyme A hydrolase                         | Branched-chain amino acid catabolism | 466                | 8                              | 20%        | 46222      | 6.23       | 44000  | 5.4    | 8.06E-06 **            | P                                           |
| 33                 | At2g21330  | Fructose-bisphosphate aldolase                                   | Glycolysis                           | 306                | 5                              | 12%        | 42904      | 6.18       | 38000  | 5.3    | 0.0005 **              | C                                           |
| 34                 | At4g38970  | Fructose-bisphosphate aldolase                                   | Glycolysis                           | 262                | 5                              | 13%        | 42961      | 6.78       | 39000  | 5.5    | 0.0018 **              | C                                           |
| 48                 | At5g09660  | Peroxisomal malate dehydrogenase 2                               | Fatty acid metabolism                | 493                | 7                              | 29%        | 34953      | 7.56       | 36000  | 8.1    | 0.0262                 | P                                           |
| 49                 | At2g33150  | Acetyl-CoA C-acyltransferase Ketoacyl-CoA thiolase (kat2)        | Fatty acid metabolism                | 366                | 8                              | 21%        | 48548      | 8.62       | 43000  | 9.1    | 0.0007 **              | P                                           |

<sup>§</sup> Ion score threshold ≥ 38

\*\* values having Bonferroni-corrected significance threshold of ≤ 0.5%

- glycine decarboxylase subunit 1 and 3 match the same set of peptides and hence are distinguishable from one another

<sup>#</sup> M, mitochondrion; P, peroxisome; C, Chloroplast
