# Supplementary material
Source: PubMed Central journal article supplement (PMC2953910)
Supplement: supp_M110.001214_mcp.M110.001214-5.pdf [file supp_M110.001214_mcp.M110.001214-5.pdf]

| Spot    | 0  | 1           | 2        | 4        | 8        | 12       | 13 | 14   | 16   | 20   | 0    | 1     | 2     | 4     | 8     | 12    | 13    | 14    | 16    |       |       |       |       |       |       |
|---------|----|-------------|----------|----------|----------|----------|----|------|------|------|------|-------|-------|-------|-------|-------|-------|-------|-------|-------|-------|-------|-------|-------|-------|
| Spot 6  | 0  | 0.974119393 | 0.019561 | 0.001148 | 0.071433 | 0.173211 | 0  |      |      |      | 0    |       |       |       |       |       |       |       |       |       |       |       |       |       |       |
|         | 1  | 0.938980849 | 0.028822 | 0.002492 |          |          | 1  | 0.04 |      |      | 1    | FALSE |       |       |       |       |       |       |       |       |       |       |       |       |       |
|         | 2  | 0.916392881 | 0.030092 | 0.002717 |          |          | 2  | 0.06 | 0.02 |      | 2    | FALSE | FALSE |       |       |       |       |       |       |       |       |       |       |       |       |
|         | 4  | 1.148630819 | 0.071102 | 0.015167 |          |          | 4  | 0.17 | 0.21 | 0.23 | 4    | TRUE  | TRUE  | TRUE  |       |       |       |       |       |       |       |       |       |       |       |
|         | 8  | 1.187658824 | 0.016105 | 0.000778 |          |          | 8  | 0.21 | 0.25 | 0.27 | 0.04 | 8     | TRUE  | TRUE  | TRUE  | FALSE |       |       |       |       |       |       |       |       |       |
|         | 12 | 1.158029494 | 0.057837 | 0.010035 |          |          | 12 | 0.18 | 0.22 | 0.24 | 0.01 | 0.03  | 12    | TRUE  | TRUE  | TRUE  | FALSE | FALSE |       |       |       |       |       |       |       |
|         | 13 | 1.028662398 | 0.005791 | 0.000101 |          |          | 13 | 0.05 | 0.09 | 0.11 | 0.12 | 0.16  | 0.13  | 13    | FALSE | FALSE | FALSE | FALSE | FALSE | FALSE |       |       |       |       |       |
|         | 14 | 0.8444668   | 0.052007 | 0.008114 |          |          | 14 | 0.13 | 0.09 | 0.07 | 0.30 | 0.34  | 0.31  | 0.18  | 14    | FALSE | FALSE | FALSE | TRUE  | TRUE  | TRUE  |       |       |       |       |
|         | 16 | 0.971263003 | 0.071119 | 0.015174 |          |          | 16 | 0.00 | 0.03 | 0.05 | 0.18 | 0.22  | 0.19  | 0.06  | 0.13  | 16    | FALSE | FALSE | FALSE | TRUE  | TRUE  | TRUE  | FALSE | FALSE |       |
|         | 20 | 1.004228233 | 0.072359 | 0.015708 |          |          | 20 | 0.03 | 0.07 | 0.09 | 0.14 | 0.18  | 0.15  | 0.02  | 0.16  | 0.03  | 20    | FALSE | FALSE | FALSE | FALSE | TRUE  | FALSE | FALSE | FALSE |
| Spot 7  | 0  | 1.023839533 | 0.023245 | 0.001621 | 0.090035 | 0.194462 | 0  |      |      |      | 0    |       |       |       |       |       |       |       |       |       |       |       |       |       |       |
|         | 1  | 0.923950196 | 0.064925 | 0.012646 |          |          | 1  | 0.10 |      |      | 1    | FALSE |       |       |       |       |       |       |       |       |       |       |       |       |       |
|         | 2  | 0.943861062 | 0.074296 | 0.016566 |          |          | 2  | 0.08 | 0.02 |      | 2    | FALSE | FALSE |       |       |       |       |       |       |       |       |       |       |       |       |
|         | 4  | 0.818295194 | 0.049377 | 0.007314 |          |          | 4  | 0.21 | 0.11 | 0.13 | 4    | TRUE  | FALSE | FALSE |       |       |       |       |       |       |       |       |       |       |       |
|         | 8  | 0.938513178 | 0.027304 | 0.002237 |          |          | 8  | 0.09 | 0.01 | 0.01 | 0.12 | 8     | FALSE | FALSE | FALSE | FALSE |       |       |       |       |       |       |       |       |       |
|         | 12 | 0.854082292 | 0.025109 | 0.001891 |          |          | 12 | 0.17 | 0.07 | 0.09 | 0.04 | 0.08  | 12    | FALSE | FALSE | FALSE | FALSE | FALSE |       |       |       |       |       |       |       |
|         | 13 | 1.029720712 | 0.036603 | 0.004019 |          |          | 13 | 0.01 | 0.11 | 0.09 | 0.21 | 0.09  | 0.18  | 13    | FALSE | FALSE | FALSE | TRUE  | FALSE | FALSE |       |       |       |       |       |
|         | 14 | 1.250242413 | 0.063762 | 0.012197 |          |          | 14 | 0.23 | 0.33 | 0.31 | 0.43 | 0.31  | 0.40  | 0.22  | 14    | TRUE  |       |       |       |
|         | 16 | 1.170330226 | 0.068159 | 0.013937 |          |          | 16 | 0.15 | 0.25 | 0.23 | 0.35 | 0.23  | 0.32  | 0.14  | 0.08  | 16    | FALSE | TRUE  | TRUE  | TRUE  | TRUE  | TRUE  | FALSE | FALSE |       |
|         | 20 | 1.116479482 | 0.076624 | 0.017614 |          |          | 20 | 0.09 | 0.19 | 0.17 | 0.30 | 0.18  | 0.26  | 0.09  | 0.13  | 0.05  | 20    | FALSE | FALSE | FALSE | TRUE  | FALSE | TRUE  | FALSE | FALSE |
| Spot 8  | 0  | 0.901364676 | 0.112071 | 0.03768  | 1.579636 | 0.814529 | 0  |      |      |      | 0    |       |       |       |       |       |       |       |       |       |       |       |       |       |       |
|         | 1  | 0.81581368  | 0.083733 | 0.021033 |          |          | 1  | 0.09 |      |      | 1    | FALSE |       |       |       |       |       |       |       |       |       |       |       |       |       |
|         | 2  | 0.829494847 | 0.023313 | 0.001631 |          |          | 2  | 0.07 | 0.01 |      | 2    | FALSE | FALSE |       |       |       |       |       |       |       |       |       |       |       |       |
|         | 4  | 0.831365563 | 0.036429 | 0.003981 |          |          | 4  | 0.07 | 0.02 | 0.00 | 4    | FALSE | FALSE | FALSE |       |       |       |       |       |       |       |       |       |       |       |
|         | 8  | 0.696150458 | 0.008752 | 0.00023  |          |          | 8  | 0.21 | 0.12 | 0.13 | 0.14 | 8     | FALSE | FALSE | FALSE | FALSE |       |       |       |       |       |       |       |       |       |
|         | 12 | 1.697078955 | 0.446603 | 0.598364 |          |          | 12 | 0.80 | 0.88 | 0.87 | 0.87 | 1.00  | 12    | FALSE | TRUE  | TRUE  | TRUE  | TRUE  |       |       |       |       |       |       |       |
|         | 13 | 1.652290111 | 0.340862 | 0.34856  |          |          | 13 | 0.75 | 0.84 | 0.82 | 0.82 | 0.96  | 0.04  | 13    | FALSE | TRUE  | TRUE  | TRUE  | TRUE  | FALSE |       |       |       |       |       |
|         | 14 | 1.159613107 | 0.214564 | 0.138113 |          |          | 14 | 0.26 | 0.34 | 0.33 | 0.33 | 0.46  | 0.54  | 0.49  | 14    | FALSE |       |       |       |
|         | 16 | 1.283319984 | 0.36641  | 0.402769 |          |          | 16 | 0.38 | 0.47 | 0.45 | 0.45 | 0.59  | 0.41  | 0.37  | 0.12  | 16    | FALSE |       |
|         | 20 | 1.048495071 | 0.095349 | 0.027274 |          |          | 20 | 0.15 | 0.23 | 0.22 | 0.22 | 0.35  | 0.65  | 0.60  | 0.11  | 0.23  | 20    | FALSE |
| Spot 9  | 0  | 0.952543084 | 0.033275 | 0.003322 | 0.123003 | 0.227293 | 0  |      |      |      | 0    |       |       |       |       |       |       |       |       |       |       |       |       |       |       |
|         | 1  | 0.857458092 | 0.044582 | 0.005963 |          |          | 1  | 0.10 |      |      | 1    | FALSE |       |       |       |       |       |       |       |       |       |       |       |       |       |
|         | 2  | 0.788129629 | 0.051575 | 0.00798  |          |          | 2  | 0.16 | 0.07 |      | 2    | FALSE | FALSE |       |       |       |       |       |       |       |       |       |       |       |       |
|         | 4  | 0.777506526 | 0.02019  | 0.001223 |          |          | 4  | 0.18 | 0.08 | 0.01 | 4    | FALSE | FALSE | FALSE |       |       |       |       |       |       |       |       |       |       |       |
|         | 8  | 0.896373886 | 0.04777  | 0.006846 |          |          | 8  | 0.06 | 0.04 | 0.11 | 0.12 | 8     | FALSE | FALSE | FALSE | FALSE |       |       |       |       |       |       |       |       |       |
|         | 12 | 0.956005885 | 0.100584 | 0.030352 |          |          | 12 | 0.00 | 0.10 | 0.17 | 0.18 | 0.06  | 12    | FALSE | FALSE | FALSE | FALSE | FALSE |       |       |       |       |       |       |       |
|         | 13 | 0.972905222 | 0.015536 | 0.000724 |          |          | 13 | 0.02 | 0.12 | 0.18 | 0.20 | 0.08  | 0.02  | 13    | FALSE | FALSE | FALSE | FALSE | FALSE | FALSE |       |       |       |       |       |
|         | 14 | 1.302227827 | 0.101349 | 0.030815 |          |          | 14 | 0.35 | 0.44 | 0.51 | 0.52 | 0.41  | 0.35  | 0.33  | 14    | TRUE  |       |       |       |
|         | 16 | 1.19344755  | 0.055765 | 0.009329 |          |          | 16 | 0.24 | 0.34 | 0.41 | 0.42 | 0.30  | 0.24  | 0.22  | 0.11  | 16    | TRUE  | TRUE  | TRUE  | TRUE  | TRUE  | TRUE  | FALSE | FALSE |       |
|         | 20 | 1.044192064 | 0.093896 | 0.026449 |          |          | 20 | 0.09 | 0.19 | 0.26 | 0.27 | 0.15  | 0.09  | 0.07  | 0.26  | 0.15  | 20    | FALSE | FALSE | TRUE  | TRUE  | FALSE | FALSE | FALSE | FALSE |
| Spot 10 | 0  | 0.761790762 | 0.027856 | 0.002328 | 4.063432 | 1.306395 | 0  |      |      |      | 0    |       |       |       |       |       |       |       |       |       |       |       |       |       |       |
|         | 1  | 0.694049622 | 0.071633 | 0.015394 |          |          | 1  | 0.07 |      |      | 1    | FALSE |       |       |       |       |       |       |       |       |       |       |       |       |       |
|         | 2  | 0.591934255 | 0.047722 | 0.006832 |          |          | 2  | 0.17 | 0.10 |      | 2    | FALSE | FALSE |       |       |       |       |       |       |       |       |       |       |       |       |
|         | 4  | 0.569074302 | 0.08265  | 0.020493 |          |          | 4  | 0.19 | 0.12 | 0.02 | 4    | FALSE | FALSE | FALSE |       |       |       |       |       |       |       |       |       |       |       |
|         | 8  | 0.622485097 | 0.030622 | 0.002813 |          |          | 8  | 0.14 | 0.07 | 0.03 | 0.05 | 8     | FALSE | FALSE | FALSE | FALSE |       |       |       |       |       |       |       |       |       |
|         | 12 | 2.387073101 | 0.654852 | 1.286494 |          |          | 12 | 1.63 | 1.69 | 1.80 | 1.82 | 1.76  | 12    | TRUE  | TRUE  | TRUE  | TRUE  | TRUE  |       |       |       |       |       |       |       |
|         | 13 | 1.871923172 | 0.483449 | 0.701169 |          |          | 13 | 1.11 | 1.18 | 1.28 | 1.30 | 1.25  | 0.52  | 13    | FALSE | FALSE | FALSE | FALSE | FALSE | FALSE |       |       |       |       |       |
|         | 14 | 1.79532437  | 0.688827 | 1.423449 |          |          | 14 | 1.03 | 1.10 | 1.20 | 1.23 | 1.17  | 0.59  | 0.08  | 14    | FALSE |       |       |       |
|         | 16 | 1.247461531 | 0.3973   | 0.473541 |          |          | 16 | 0.49 | 0.55 | 0.66 | 0.68 | 0.62  | 1.14  | 0.62  | 0.55  | 16    | FALSE |       |
|         | 20 | 0.952367116 | 0.208901 | 0.130918 |          |          | 20 | 0.19 | 0.26 | 0.36 | 0.38 | 0.33  | 1.43  | 0.92  | 0.84  | 0.30  | 20    | FALSE | FALSE | FALSE | FALSE | TRUE  | FALSE | FALSE | FALSE |

| Spot    | Q (critical) = Q(0.05) * SQRT( SUM VARIANCE/20/3) |          |          |             |          | Q(s)     |    |      |      |      | significant x vs y? |      |      |      |      |      |      |      |      |     |       |       |       |       |       |       |       |       |       |       |       |       |       |       |       |       |       |       |       |       |
|---------|---------------------------------------------------|----------|----------|-------------|----------|----------|----|------|------|------|---------------------|------|------|------|------|------|------|------|------|-----|-------|-------|-------|-------|-------|-------|-------|-------|-------|-------|-------|-------|-------|-------|-------|-------|-------|-------|-------|-------|
|         | 0                                                 | 1        | 2        | 4           | 8        | 0        | 1  | 2    | 4    | 8    | 0                   | 1    | 2    | 4    | 8    | 12   | 13   | 14   | 16   |     |       |       |       |       |       |       |       |       |       |       |       |       |       |       |       |       |       |       |       |       |
| Spot 11 | 0                                                 | 0.790938 | 0.012278 | 0.000452272 | 4.513707 | 1.376876 | 0  | 0.1  | 0.0  | 0.0  | 0.0                 | 0.0  | 0.0  | 0.0  | 0.0  | 0.0  | 0.0  | 0.0  | 0.0  | 0.0 | 0     | FALSE |
|         | 1                                                 | 0.659348 | 0.046022 | 0.006354141 |          |          | 1  | 0.2  | 0.0  | 0.0  | 0.0                 | 0.0  | 0.0  | 0.0  | 0.0  | 0.0  | 0.0  | 0.0  | 0.0  | 0.0 | 1     | FALSE |       |
|         | 2                                                 | 0.620373 | 0.021547 | 0.001392837 |          |          | 2  | 0.2  | 0.1  | 0.0  | 0.0                 | 0.0  | 0.0  | 0.0  | 0.0  | 0.0  | 0.0  | 0.0  | 0.0  | 0.0 | 2     | FALSE |       |
|         | 4                                                 | 0.571462 | 0.079649 | 0.019032015 |          |          | 4  | 0.2  | 0.1  | 0.0  | 0.0                 | 0.0  | 0.0  | 0.0  | 0.0  | 0.0  | 0.0  | 0.0  | 0.0  | 0.0 | 4     | FALSE |       |
|         | 8                                                 | 0.667367 | 0.030255 | 0.002746088 |          |          | 8  | 0.1  | 0.0  | 0.0  | 0.1                 | 0.0  | 0.0  | 0.0  | 0.0  | 0.0  | 0.0  | 0.0  | 0.0  | 0.0 | 8     | FALSE |       |
|         | 12                                                | 2.759618 | 0.690584 | 1.430717558 |          |          | 12 | 2.0  | 2.1  | 2.1  | 2.2                 | 2.1  | 0.9  | 0.9  | 0.9  | 0.9  | 0.9  | 0.9  | 0.9  | 0.9 | 12    | TRUE  |       |
|         | 13                                                | 1.868894 | 0.430123 | 0.555017208 |          |          | 13 | 1.1  | 1.2  | 1.2  | 1.3                 | 1.2  | 0.9  | 0.9  | 0.9  | 0.9  | 0.9  | 0.9  | 0.9  | 13  | FALSE |       |       |
|         | 14                                                | 1.985534 | 0.799453 | 1.917374703 |          |          | 14 | 1.2  | 1.3  | 1.4  | 1.4                 | 1.3  | 0.8  | 0.8  | 0.8  | 0.8  | 0.8  | 0.8  | 0.8  | 14  | FALSE |       |       |
|         | 16                                                | 1.362683 | 0.353046 | 0.373924892 |          |          | 16 | 0.6  | 0.7  | 0.7  | 0.8                 | 0.7  | 1.4  | 0.5  | 0.6  | 0.6  | 0.6  | 0.6  | 0.6  | 16  | FALSE |       |       |
|         | 20                                                | 1.132017 | 0.262485 | 0.206695056 |          |          | 20 | 0.3  | 0.5  | 0.5  | 0.6                 | 0.5  | 1.6  | 0.7  | 0.9  | 0.9  | 0.9  | 0.9  | 0.9  | 20  | FALSE |       |       |
| Spot 12 | 0                                                 | 1.066109 | 0.025742 | 0.001987953 | 0.161931 | 0.260791 | 0  | 0.14 | 0.0  | 0.0  | 0.0                 | 0.0  | 0.0  | 0.0  | 0.0  | 0.0  | 0.0  | 0.0  | 0.0  | 0   | FALSE |       |       |
|         | 1                                                 | 0.927792 | 0.059087 | 0.01047375  |          |          | 1  | 0.19 | 0.05 | 0.0  | 0.0                 | 0.0  | 0.0  | 0.0  | 0.0  | 0.0  | 0.0  | 0.0  | 0.0  | 1   | FALSE |       |       |
|         | 2                                                 | 0.876259 | 0.040786 | 0.0049906   |          |          | 2  | 0.02 | 0.11 | 0.17 | 0.17                | 0.17 | 0.17 | 0.17 | 0.17 | 0.17 | 0.17 | 0.17 | 0.17 | 2   | FALSE |       |       |
|         | 4                                                 | 1.042074 | 0.050855 | 0.007758587 |          |          | 4  | 0.16 | 0.30 | 0.35 | 0.19                | 0.19 | 0.19 | 0.19 | 0.19 | 0.19 | 0.19 | 0.19 | 0.19 | 4   | FALSE | TRUE  |       |       |
|         | 8                                                 | 1.227478 | 0.075771 | 0.017223538 |          |          | 8  | 0.16 | 0.30 | 0.35 | 0.19                | 0.00 | 0.18 | 0.18 | 0.18 | 0.18 | 0.18 | 0.18 | 0.18 | 8   | FALSE | TRUE  |       |       |
|         | 12                                                | 1.230128 | 0.062728 | 0.011804435 |          |          | 12 | 0.02 | 0.12 | 0.17 | 0.01                | 0.18 | 0.18 | 0.18 | 0.18 | 0.18 | 0.18 | 0.18 | 0.18 | 12  | FALSE | TRUE  |       |       |
|         | 13                                                | 1.047697 | 0.047117 | 0.006660028 |          |          | 13 | 0.17 | 0.04 | 0.02 | 0.15                | 0.34 | 0.34 | 0.16 | 0.16 | 0.16 | 0.16 | 0.16 | 0.16 | 13  | FALSE |       |       |
|         | 14                                                | 0.892299 | 0.016224 | 0.000789688 |          |          | 14 | 0.06 | 0.08 | 0.13 | 0.04                | 0.22 | 0.22 | 0.04 | 0.11 | 0.11 | 0.11 | 0.11 | 0.11 | 14  | FALSE |       |       |
|         | 16                                                | 1.005547 | 0.128328 | 0.049404334 |          |          | 16 | 0.05 | 0.09 | 0.14 | 0.02                | 0.21 | 0.21 | 0.03 | 0.13 | 0.13 | 0.13 | 0.13 | 0.13 | 16  | FALSE |       |       |
|         | 20                                                | 1.019389 | 0.130177 | 0.050838126 |          |          | 20 | 0.05 | 0.09 | 0.14 | 0.02                | 0.21 | 0.21 | 0.03 | 0.13 | 0.13 | 0.13 | 0.13 | 0.13 | 20  | FALSE |       |       |
| Spot 13 | 0                                                 | 0.99232  | 0.027296 | 0.002235139 | 0.018051 | 0.087072 | 0  | 0.09 | 0.0  | 0.0  | 0.0                 | 0.0  | 0.0  | 0.0  | 0.0  | 0.0  | 0.0  | 0.0  | 0.0  | 0   | TRUE  | FALSE |       |       |
|         | 1                                                 | 1.086092 | 0.0161   | 0.000777659 |          |          | 1  | 0.09 | 0.01 | 0.06 | 0.06                | 0.06 | 0.06 | 0.06 | 0.06 | 0.06 | 0.06 | 0.06 | 0.06 | 1   | TRUE  | FALSE |       |       |
|         | 2                                                 | 1.080456 | 0.018178 | 0.000991355 |          |          | 2  | 0.15 | 0.05 | 0.06 | 0.00                | 0.06 | 0.06 | 0.06 | 0.06 | 0.06 | 0.06 | 0.06 | 0.06 | 2   | TRUE  | FALSE |       |       |
|         | 4                                                 | 1.13837  | 0.022482 | 0.001516322 |          |          | 4  | 0.21 | 0.11 | 0.12 | 0.06                | 0.06 | 0.06 | 0.06 | 0.06 | 0.06 | 0.06 | 0.06 | 0.06 | 4   | TRUE  |       |       |
|         | 8                                                 | 1.198698 | 0.029762 | 0.002657384 |          |          | 8  | 0.15 | 0.05 | 0.06 | 0.00                | 0.06 | 0.06 | 0.06 | 0.06 | 0.06 | 0.06 | 0.06 | 0.06 | 8   | TRUE  |       |       |
|         | 12                                                | 1.138275 | 0.035675 | 0.003818095 |          |          | 12 | 0.08 | 0.01 | 0.01 | 0.07                | 0.13 | 0.06 | 0.00 | 0.00 | 0.00 | 0.00 | 0.00 | 0.00 | 12  | TRUE  | FALSE |       |       |
|         | 13                                                | 1.073343 | 0.017382 | 0.000906375 |          |          | 13 | 0.08 | 0.01 | 0.01 | 0.07                | 0.13 | 0.06 | 0.00 | 0.00 | 0.00 | 0.00 | 0.00 | 0.00 | 13  | FALSE |       |       |
|         | 14                                                | 1.073368 | 0.003652 | 4.00083E-05 |          |          | 14 | 0.12 | 0.03 | 0.03 | 0.02                | 0.08 | 0.02 | 0.04 | 0.04 | 0.04 | 0.04 | 0.04 | 0.04 | 14  | FALSE |       |       |
|         | 16                                                | 1.113864 | 0.016607 | 0.000827418 |          |          | 16 | 0.03 | 0.07 | 0.06 | 0.12                | 0.18 | 0.12 | 0.05 | 0.05 | 0.05 | 0.05 | 0.05 | 0.05 | 16  | TRUE  | FALSE |       |       |
|         | 20                                                | 1.021086 | 0.037777 | 0.004281268 |          |          | 20 | 0.03 | 0.07 | 0.06 | 0.12                | 0.18 | 0.12 | 0.05 | 0.05 | 0.05 | 0.05 | 0.05 | 0.05 | 20  | FALSE | FALSE | FALSE | TRUE  | TRUE  | TRUE  | TRUE  | FALSE | TRUE  |       |       |
| Spot 14 | 0                                                 | 0.919566 | 0.024316 | 0.001773855 | 0.078375 | 0.181434 | 0  | 0.11 | 0.03 | 0.01 | 0.01                | 0.01 | 0.01 | 0.01 | 0.01 | 0.01 | 0.01 | 0.01 | 0.01 | 0   | FALSE |       |       |
|         | 1                                                 | 0.813403 | 0.01226  | 0.000450901 |          |          | 1  | 0.14 | 0.04 | 0.01 | 0.01                | 0.01 | 0.01 | 0.01 | 0.01 | 0.01 | 0.01 | 0.01 | 0.01 | 1   | FALSE |       |       |
|         | 2                                                 | 0.783232 | 0.045763 | 0.006282704 |          |          | 2  | 0.13 | 0.02 | 0.01 | 0.02                | 0.02 | 0.02 | 0.02 | 0.02 | 0.02 | 0.02 | 0.02 | 0.02 | 2   | FALSE |       |       |
|         | 4                                                 | 0.774866 | 0.057511 | 0.00922716  |          |          | 4  | 0.01 | 0.09 | 0.12 | 0.13                | 0.12 | 0.12 | 0.12 | 0.12 | 0.12 | 0.12 | 0.12 | 0.12 | 4   | FALSE |       |       |
|         | 8                                                 | 0.792375 | 0.039136 | 0.004594845 |          |          | 8  | 0.13 | 0.24 | 0.27 | 0.27                | 0.26 | 0.14 | 0.14 | 0.14 | 0.14 | 0.14 | 0.14 | 0.14 | 8   | FALSE |       |       |
|         | 12                                                | 0.907446 | 0.023774 | 0.001695661 |          |          | 12 | 0.02 | 0.12 | 0.15 | 0.16                | 0.15 | 0.03 | 0.11 | 0.11 | 0.11 | 0.11 | 0.11 | 0.11 | 12  | FALSE | TRUE  |       |       |
|         | 13                                                | 1.048982 | 0.084657 | 0.021500557 |          |          | 13 | 0.04 | 0.07 | 0.10 | 0.10                | 0.09 | 0.03 | 0.17 | 0.06 | 0.06 | 0.06 | 0.06 | 0.06 | 13  | FALSE |       |       |
|         | 14                                                | 0.937521 | 0.023027 | 0.001590786 |          |          | 14 | 0.00 | 0.10 | 0.13 | 0.14                | 0.13 | 0.01 | 0.13 | 0.02 | 0.04 | 0.04 | 0.04 | 0.04 | 14  | FALSE |       |       |
|         | 16                                                | 0.879672 | 0.09982  | 0.029892285 |          |          | 16 | 0.00 | 0.10 | 0.13 | 0.14                | 0.13 | 0.01 | 0.13 | 0.02 | 0.04 | 0.04 | 0.04 | 0.04 | 16  | FALSE |       |       |
|         | 20                                                | 0.917478 | 0.014956 | 0.000671006 |          |          | 20 | 0.00 | 0.10 | 0.13 | 0.14                | 0.13 | 0.01 | 0.13 | 0.02 | 0.04 | 0.04 | 0.04 | 0.04 | 20  | FALSE |       |       |
| Spot 15 | 0                                                 | 0.97934  | 0.009394 | 0.00026472  |          |          |    |      |      |      |                     |      |      |      |      |      |      |      |      |     |       |       |       |       |       |       |       |       |       |       |       |       |       |       |       |       |       |       |       |       |









Spot 36  
 0 1.040552 0.011549 0.000400116 0.09242 0.19702  
 1 0.970531 0.019106 0.001095107  
 2 1.013598 0.011003 0.000363205  
 4 0.969351 0.054422 0.008885289  
 8 1.074143 0.019323 0.001120145  
 12 0.942784 0.016611 0.000827815  
 13 0.990266 0.037291 0.004171746  
 14 1.238462 0.141198 0.059810388  
 16 1.087942 0.032569 0.003182227  
 20 1.016041 0.064714 0.012563787

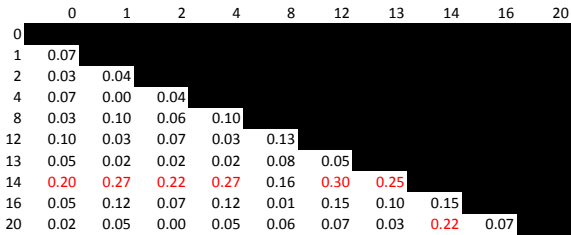

0  
 1 FALSE  
 2 FALSE FALSE  
 4 FALSE FALSE FALSE  
 8 FALSE FALSE FALSE FALSE  
 12 FALSE FALSE FALSE FALSE FALSE  
 13 FALSE FALSE FALSE FALSE FALSE  
 14 TRUE TRUE TRUE TRUE FALSE TRUE TRUE  
 16 FALSE FALSE FALSE FALSE FALSE FALSE FALSE FALSE  
 20 FALSE FALSE FALSE FALSE FALSE FALSE FALSE TRUE FALSE

Spot 37  
 0 0.911135 0.044502 0.005941264 0.117672 0.222313  
 1 1.059922 0.045812 0.006296324  
 2 1.135358 0.052571 0.008291225  
 4 0.980227 0.097309 0.028407062  
 8 0.877966 0.048569 0.007076845  
 12 0.872379 0.014602 0.00063965  
 13 0.934392 0.040381 0.004891834  
 14 0.910817 0.016506 0.000817371  
 16 0.990798 0.088063 0.023265502  
 20 0.921189 0.103352 0.032044912

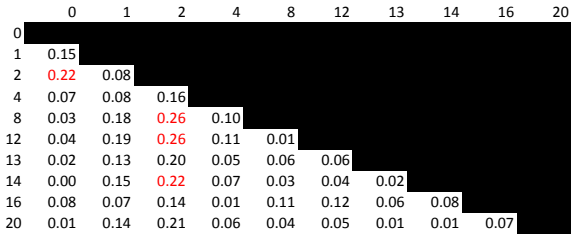

0  
 1 FALSE  
 2 TRUE FALSE  
 4 FALSE FALSE FALSE  
 8 FALSE FALSE TRUE FALSE  
 12 FALSE FALSE TRUE FALSE FALSE  
 13 FALSE FALSE FALSE FALSE FALSE  
 14 FALSE FALSE TRUE FALSE FALSE FALSE  
 16 FALSE FALSE FALSE FALSE FALSE FALSE FALSE  
 20 FALSE FALSE FALSE FALSE FALSE FALSE FALSE FALSE FALSE

Spot 38  
 0 0.9145 0.04991 0.007473005 0.081495 0.18501  
 1 1.035076 0.044996 0.006073852  
 2 1.125253 0.02277 0.001555476  
 4 0.97575 0.059917 0.010770059  
 8 0.916752 0.040448 0.004908219  
 12 0.912685 0.010262 0.000315937  
 13 0.911287 0.054088 0.008776672  
 14 0.883931 0.010496 0.000330502  
 16 0.989492 0.07306 0.016013398  
 20 0.942337 0.091794 0.02527837

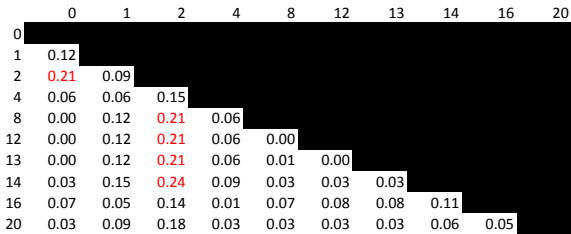

0  
 1 FALSE  
 2 TRUE FALSE  
 4 FALSE FALSE FALSE  
 8 FALSE FALSE TRUE FALSE  
 12 FALSE FALSE TRUE FALSE FALSE  
 13 FALSE FALSE TRUE FALSE FALSE  
 14 FALSE FALSE TRUE FALSE FALSE FALSE  
 16 FALSE FALSE FALSE FALSE FALSE FALSE FALSE  
 20 FALSE FALSE FALSE FALSE FALSE FALSE FALSE FALSE FALSE

Spot 39  
 0 0.830616 0.035078 0.003691341 0.194893 0.286105  
 1 1.012168 0.037358 0.004186934  
 2 0.946624 0.068382 0.014028378  
 4 0.85634 0.057889 0.010053382  
 8 0.766244 0.068264 0.013980117  
 12 0.769037 0.01269 0.000483074  
 13 0.806694 0.011147 0.000372798  
 14 0.893715 0.105627 0.033471196  
 16 1.057833 0.116304 0.040579844  
 20 0.951719 0.157105 0.074045595

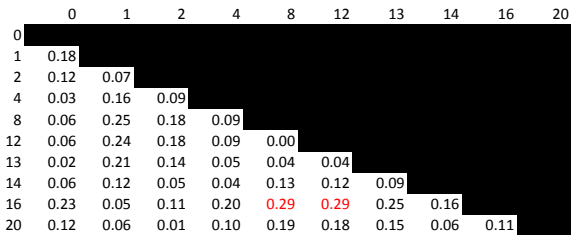

0  
 1 FALSE  
 2 FALSE FALSE  
 4 FALSE FALSE FALSE  
 8 FALSE FALSE FALSE FALSE  
 12 FALSE FALSE FALSE FALSE FALSE  
 13 FALSE FALSE FALSE FALSE FALSE  
 14 FALSE FALSE FALSE FALSE FALSE  
 16 FALSE FALSE FALSE FALSE TRUE TRUE FALSE  
 20 FALSE FALSE FALSE FALSE FALSE FALSE FALSE FALSE FALSE

Spot 40  
 0 0.867247 0.081261 0.019809911 0.1978 0.288231  
 1 0.939211 0.033302 0.003327054  
 2 1.001235 0.046022 0.006354021  
 4 0.840298 0.048275 0.006991298  
 8 0.760012 0.041 0.005042954  
 12 0.600059 0.041305 0.005118221  
 13 0.762415 0.069489 0.014486247  
 14 0.910317 0.128356 0.049425403  
 16 0.993711 0.075347 0.017031665  
 20 1.009881 0.152985 0.070213204

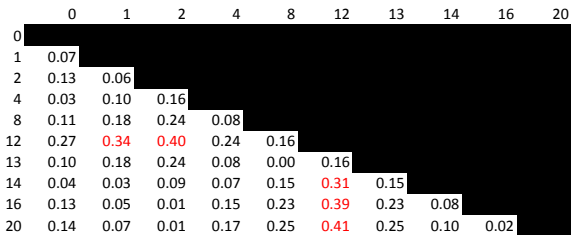

0  
 1 FALSE  
 2 FALSE FALSE  
 4 FALSE FALSE FALSE  
 8 FALSE FALSE FALSE FALSE  
 12 FALSE TRUE TRUE FALSE FALSE  
 13 FALSE FALSE FALSE FALSE FALSE  
 14 FALSE FALSE FALSE FALSE FALSE TRUE FALSE  
 16 FALSE FALSE FALSE FALSE FALSE TRUE FALSE FALSE  
 20 FALSE FALSE FALSE FALSE FALSE TRUE FALSE FALSE FALSE



| Spot    | Q (critical) = Q (0.05) * SQRT( SUM VARIANCE/20/3) |          |          |          |          | Q(s)     |      |      |      |      | significant x vs y? |      |      |   |   |    |    |    |    |    |       |       |       |       |       |       |       |       |       |
|---------|----------------------------------------------------|----------|----------|----------|----------|----------|------|------|------|------|---------------------|------|------|---|---|----|----|----|----|----|-------|-------|-------|-------|-------|-------|-------|-------|-------|
|         | 0                                                  | 1        | 2        | 4        | 8        | 0        | 1    | 2    | 4    | 8    | 0                   | 1    | 2    | 4 | 8 | 12 | 13 | 14 | 16 |    |       |       |       |       |       |       |       |       |       |
| Spot 41 | 0                                                  | 0.973623 | 0.049621 | 0.007387 | 0.084376 | 0.188251 | 0    | 0    | 0    | 0    | 0                   | 0    | 0    | 0 | 0 | 0  | 0  | 0  | 0  | 0  | 0     | 0     | 0     | 0     | 0     | 0     | 0     | 0     | 0     |
|         | 1                                                  | 1.108728 | 0.050028 | 0.007508 | 0.14     | 0        | 0    | 0    | 0    | 0    | 0                   | 0    | 0    | 0 | 0 | 0  | 0  | 0  | 0  | 1  | FALSE |       |       |       |       |       |       |       |       |
|         | 2                                                  | 1.05943  | 0.077883 | 0.018197 | 0.09     | 0.05     | 0    | 0    | 0    | 0    | 0                   | 0    | 0    | 0 | 0 | 0  | 0  | 0  | 0  | 2  | FALSE | FALSE |       |       |       |       |       |       |       |
|         | 4                                                  | 1.10129  | 0.052733 | 0.008342 | 0.13     | 0.01     | 0.04 | 0    | 0    | 0    | 0                   | 0    | 0    | 0 | 0 | 0  | 0  | 0  | 0  | 4  | FALSE | FALSE | FALSE |       |       |       |       |       |       |
|         | 8                                                  | 0.977209 | 0.04124  | 0.005102 | 0.00     | 0.13     | 0.08 | 0.12 | 0    | 0    | 0                   | 0    | 0    | 0 | 0 | 0  | 0  | 0  | 0  | 8  | FALSE | FALSE | FALSE | FALSE |       |       |       |       |       |
|         | 12                                                 | 0.880969 | 0.030326 | 0.002759 | 0.09     | 0.23     | 0.18 | 0.22 | 0.10 | 0    | 0                   | 0    | 0    | 0 | 0 | 0  | 0  | 0  | 0  | 12 | FALSE | TRUE  | FALSE | TRUE  | FALSE |       |       |       |       |
|         | 13                                                 | 0.933129 | 0.034788 | 0.003631 | 0.04     | 0.18     | 0.13 | 0.17 | 0.04 | 0.05 | 0                   | 0    | 0    | 0 | 0 | 0  | 0  | 0  | 0  | 13 | FALSE | FALSE | FALSE | FALSE | FALSE | FALSE |       |       |       |
|         | 14                                                 | 0.859502 | 0.029867 | 0.002676 | 0.11     | 0.25     | 0.20 | 0.24 | 0.12 | 0.02 | 0.07                | 0    | 0    | 0 | 0 | 0  | 0  | 0  | 0  | 14 | FALSE | TRUE  | TRUE  | TRUE  | FALSE | FALSE | FALSE |       |       |
|         | 16                                                 | 0.989186 | 0.062677 | 0.011785 | 0.02     | 0.12     | 0.07 | 0.11 | 0.01 | 0.11 | 0.06                | 0.13 | 0    | 0 | 0 | 0  | 0  | 0  | 0  | 16 | FALSE |
|         | 20                                                 | 0.926332 | 0.075249 | 0.016987 | 0.05     | 0.18     | 0.13 | 0.17 | 0.05 | 0.05 | 0.01                | 0.07 | 0.06 | 0 | 0 | 0  | 0  | 0  | 0  | 20 | FALSE |
| Spot 42 | 0                                                  | 1.009678 | 0.050551 | 0.007666 | 0.157376 | 0.257097 | 0    | 0    | 0    | 0    | 0                   | 0    | 0    | 0 | 0 | 0  | 0  | 0  | 0  | 0  | 0     | 0     | 0     | 0     | 0     | 0     | 0     | 0     | 0     |
|         | 1                                                  | 1.198278 | 0.061486 | 0.011342 | 0.19     | 0        | 0    | 0    | 0    | 0    | 0                   | 0    | 0    | 0 | 0 | 0  | 0  | 0  | 0  | 1  | FALSE |       |       |       |       |       |       |       |       |
|         | 2                                                  | 1.195672 | 0.057825 | 0.010031 | 0.19     | 0.00     | 0    | 0    | 0    | 0    | 0                   | 0    | 0    | 0 | 0 | 0  | 0  | 0  | 0  | 2  | FALSE | FALSE |       |       |       |       |       |       |       |
|         | 4                                                  | 1.087557 | 0.088218 | 0.023347 | 0.08     | 0.11     | 0.11 | 0    | 0    | 0    | 0                   | 0    | 0    | 0 | 0 | 0  | 0  | 0  | 0  | 4  | FALSE | TRUE  | FALSE |       |       |       |       |       |       |
|         | 8                                                  | 0.93896  | 0.041739 | 0.005227 | 0.07     | 0.26     | 0.26 | 0.15 | 0    | 0    | 0                   | 0    | 0    | 0 | 0 | 0  | 0  | 0  | 0  | 8  | FALSE | TRUE  | FALSE | FALSE |       |       |       |       |       |
|         | 12                                                 | 0.791082 | 0.021051 | 0.001329 | 0.22     | 0.41     | 0.40 | 0.30 | 0.15 | 0    | 0                   | 0    | 0    | 0 | 0 | 0  | 0  | 0  | 0  | 12 | FALSE | TRUE  | TRUE  | TRUE  | FALSE |       |       |       |       |
|         | 13                                                 | 0.900536 | 0.015305 | 0.000703 | 0.11     | 0.30     | 0.30 | 0.19 | 0.04 | 0.11 | 0.11                | 0    | 0    | 0 | 0 | 0  | 0  | 0  | 0  | 13 | FALSE | TRUE  | TRUE  | FALSE | FALSE | FALSE |       |       |       |
|         | 14                                                 | 1.052921 | 0.112999 | 0.038307 | 0.04     | 0.15     | 0.14 | 0.03 | 0.11 | 0.26 | 0.15                | 0    | 0    | 0 | 0 | 0  | 0  | 0  | 0  | 14 | FALSE | FALSE | FALSE | FALSE | FALSE | TRUE  | FALSE |       |       |
|         | 16                                                 | 1.074562 | 0.078183 | 0.018338 | 0.06     | 0.12     | 0.12 | 0.01 | 0.14 | 0.28 | 0.17                | 0.02 | 0    | 0 | 0 | 0  | 0  | 0  | 0  | 16 | FALSE | FALSE | FALSE | FALSE | FALSE | TRUE  | FALSE | FALSE |       |
|         | 20                                                 | 0.978008 | 0.117028 | 0.041087 | 0.03     | 0.22     | 0.22 | 0.11 | 0.04 | 0.19 | 0.08                | 0.07 | 0.10 | 0 | 0 | 0  | 0  | 0  | 0  | 20 | FALSE |
| Spot 43 | 0                                                  | 1.02501  | 0.045108 | 0.006104 | 0.098939 | 0.203851 | 0    | 0    | 0    | 0    | 0                   | 0    | 0    | 0 | 0 | 0  | 0  | 0  | 0  | 0  | 0     | 0     | 0     | 0     | 0     | 0     | 0     | 0     | 0     |
|         | 1                                                  | 1.106997 | 0.052266 | 0.008195 | 0.08     | 0        | 0    | 0    | 0    | 0    | 0                   | 0    | 0    | 0 | 0 | 0  | 0  | 0  | 0  | 1  | FALSE |       |       |       |       |       |       |       |       |
|         | 2                                                  | 1.254238 | 0.070051 | 0.014721 | 0.23     | 0.15     | 0    | 0    | 0    | 0    | 0                   | 0    | 0    | 0 | 0 | 0  | 0  | 0  | 0  | 2  | TRUE  | FALSE |       |       |       |       |       |       |       |
|         | 4                                                  | 1.049868 | 0.058732 | 0.010348 | 0.02     | 0.06     | 0.20 | 0    | 0    | 0    | 0                   | 0    | 0    | 0 | 0 | 0  | 0  | 0  | 0  | 4  | FALSE | FALSE | TRUE  |       |       |       |       |       |       |
|         | 8                                                  | 1.157966 | 0.043431 | 0.005659 | 0.13     | 0.05     | 0.10 | 0.11 | 0    | 0    | 0                   | 0    | 0    | 0 | 0 | 0  | 0  | 0  | 0  | 8  | FALSE | FALSE | FALSE | FALSE |       |       |       |       |       |
|         | 12                                                 | 0.874372 | 0.032386 | 0.003147 | 0.15     | 0.23     | 0.38 | 0.18 | 0.28 | 0    | 0                   | 0    | 0    | 0 | 0 | 0  | 0  | 0  | 0  | 12 | FALSE | TRUE  | TRUE  | FALSE | TRUE  |       |       |       |       |
|         | 13                                                 | 0.870501 | 0.07193  | 0.015522 | 0.15     | 0.24     | 0.38 | 0.18 | 0.29 | 0.00 | 0                   | 0    | 0    | 0 | 0 | 0  | 0  | 0  | 0  | 13 | FALSE | TRUE  | TRUE  | FALSE | FALSE | FALSE |       |       |       |
|         | 14                                                 | 0.972769 | 0.078205 | 0.018348 | 0.05     | 0.13     | 0.28 | 0.08 | 0.19 | 0.10 | 0.10                | 0    | 0    | 0 | 0 | 0  | 0  | 0  | 0  | 14 | FALSE | FALSE | TRUE  | FALSE | FALSE | FALSE | FALSE |       |       |
|         | 16                                                 | 1.132075 | 0.06815  | 0.013933 | 0.11     | 0.03     | 0.12 | 0.08 | 0.03 | 0.26 | 0.26                | 0.16 | 0    | 0 | 0 | 0  | 0  | 0  | 0  | 16 | FALSE | FALSE | FALSE | FALSE | FALSE | TRUE  | TRUE  | FALSE |       |
|         | 20                                                 | 1.140061 | 0.031421 | 0.002962 | 0.12     | 0.03     | 0.11 | 0.09 | 0.02 | 0.27 | 0.27                | 0.17 | 0.01 | 0 | 0 | 0  | 0  | 0  | 0  | 20 | FALSE | FALSE | FALSE | FALSE | FALSE | TRUE  | TRUE  | FALSE | FALSE |
| Spot 44 | 0                                                  | 1.013136 | 0.052883 | 0.00839  | 0.068493 | 0.16961  | 0    | 0    | 0    | 0    | 0                   | 0    | 0    | 0 | 0 | 0  | 0  | 0  | 0  | 0  | 0     | 0     | 0     | 0     | 0     | 0     | 0     | 0     | 0     |
|         | 1                                                  | 1.000708 | 0.028096 | 0.002368 | 0.01     | 0        | 0    | 0    | 0    | 0    | 0                   | 0    | 0    | 0 | 0 | 0  | 0  | 0  | 0  | 1  | FALSE |       |       |       |       |       |       |       |       |
|         | 2                                                  | 1.053582 | 0.016846 | 0.000851 | 0.04     | 0.05     | 0    | 0    | 0    | 0    | 0                   | 0    | 0    | 0 | 0 | 0  | 0  | 0  | 0  | 2  | FALSE | FALSE |       |       |       |       |       |       |       |
|         | 4                                                  | 1.031383 | 0.053529 | 0.008596 | 0.02     | 0.03     | 0.02 | 0    | 0    | 0    | 0                   | 0    | 0    | 0 | 0 | 0  | 0  | 0  | 0  | 4  | FALSE | FALSE | FALSE |       |       |       |       |       |       |
|         | 8                                                  | 0.951143 | 0.037348 | 0.004185 | 0.06     | 0.05     | 0.10 | 0.08 | 0    | 0    | 0                   | 0    | 0    | 0 | 0 | 0  | 0  | 0  | 0  | 8  | FALSE | FALSE | FALSE | FALSE |       |       |       |       |       |
|         | 12                                                 | 0.792077 | 0.032804 | 0.003228 | 0.22     | 0.21     | 0.26 | 0.24 | 0.16 | 0    | 0                   | 0    | 0    | 0 | 0 | 0  | 0  | 0  | 0  | 12 | TRUE  | TRUE  | TRUE  | TRUE  | FALSE |       |       |       |       |
|         | 13                                                 | 0.895553 | 0.057251 | 0.009833 | 0.12     | 0.11     | 0.16 | 0.14 | 0.06 | 0.10 | 0                   | 0    | 0    | 0 | 0 | 0  | 0  | 0  | 0  | 13 | FALSE | FALSE | FALSE | FALSE | FALSE | FALSE |       |       |       |
|         | 14                                                 | 0.994325 | 0.045007 | 0.006077 | 0.02     | 0.01     | 0.06 | 0.04 | 0.04 | 0.20 | 0.10                | 0    | 0    | 0 | 0 | 0  | 0  | 0  | 0  | 14 | FALSE | FALSE | FALSE | FALSE | FALSE | TRUE  | FALSE |       |       |
|         | 16                                                 | 1.042699 | 0.058654 | 0.010321 | 0.03     | 0.04     | 0.01 | 0.01 | 0.09 | 0.25 | 0.15                | 0.05 | 0    | 0 | 0 | 0  | 0  | 0  | 0  | 16 | FALSE | FALSE | FALSE | FALSE | FALSE | TRUE  | FALSE | FALSE |       |
|         | 20                                                 | 1.009779 | 0.069866 | 0.014644 | 0.00     | 0.01     | 0.04 | 0.02 | 0.06 | 0.22 | 0.11                | 0.02 | 0.03 | 0 | 0 | 0  | 0  | 0  | 0  | 20 | FALSE | FALSE | FALSE | FALSE | FALSE | TRUE  | FALSE | FALSE | FALSE |
| Spot 45 | 0                                                  | 1.129153 | 0.175802 | 0.092719 | 0.257975 | 0.329167 | 0    | 0    | 0    | 0    | 0                   | 0    | 0    | 0 | 0 | 0  | 0  | 0  | 0  | 0  | 0     | 0     | 0     | 0     | 0     | 0     | 0     | 0     | 0     |
|         | 1                                                  | 0.973335 | 0.046124 | 0.006382 | 0.16     | 0        | 0    | 0    | 0    | 0    | 0                   | 0    | 0    | 0 | 0 | 0  | 0  | 0  | 0  | 1  | FALSE |       |       |       |       |       |       |       |       |
|         | 2                                                  | 1.028866 | 0.032292 | 0.003128 | 0.10     | 0.06     | 0    | 0    | 0    | 0    | 0                   | 0    | 0    | 0 | 0 | 0  | 0  | 0  | 0  | 2  | FALSE | FALSE |       |       |       |       |       |       |       |
|         | 4                                                  | 0.91567  | 0.030933 | 0.002871 | 0.21     | 0.06     | 0.11 | 0    | 0    | 0    | 0                   | 0    | 0    | 0 | 0 | 0  | 0  | 0  | 0  | 4  | FALSE | FALSE | FALSE |       |       |       |       |       |       |
|         | 8                                                  | 1.041527 | 0.060048 | 0.010817 | 0.09     | 0.07     | 0.01 | 0.13 | 0    | 0    | 0                   | 0    | 0    | 0 | 0 | 0  | 0  | 0  | 0  | 8  | FALSE | FALSE | FALSE | FALSE |       |       |       |       |       |
|         | 12                                                 | 0.547481 | 0.049632 | 0.00739  | 0.58     | 0.43     | 0.48 | 0.37 | 0.49 | 0    | 0                   | 0    | 0    | 0 | 0 | 0  | 0  | 0  | 0  | 12 | TRUE  | TRUE  | TRUE  | TRUE  | TRUE  |       |       |       |       |
|         | 13                                                 | 0.67945  | 0.089979 | 0.024289 | 0.45     | 0.29     | 0.35 | 0.24 | 0.36 | 0.13 | 0                   | 0    | 0    | 0 | 0 | 0  | 0  | 0  | 0  | 13 | TRUE  | FALSE | TRUE  | FALSE | TRUE  | FALSE |       |       |       |
|         | 14                                                 | 0.877398 | 0.163989 | 0.080677 | 0.25     | 0.10     | 0.15 | 0.04 | 0.16 | 0.33 | 0.20                | 0    | 0    | 0 | 0 | 0  | 0  | 0  | 0  | 14 | FALSE | FALSE | FALSE | FALSE | FALSE | TRUE  | FALSE |       |       |
|         | 16                                                 | 1.031809 | 0.028505 | 0.002438 | 0.10     | 0.06     | 0.00 | 0.12 | 0.01 | 0.48 | 0.35                | 0.15 | 0    | 0 | 0 | 0  | 0  | 0  | 0  | 16 | FALSE | FALSE | FALSE | FALSE | FALSE | TRUE  | TRUE  | FALSE |       |
|         | 20                                                 | 1.119022 | 0.095332 | 0.027264 | 0.01     | 0.15     | 0.09 | 0.20 | 0.08 | 0.57 | 0.44                | 0.24 | 0.09 | 0 | 0 | 0  | 0  | 0  | 0  | 20 | FALSE | FALSE | FALSE | FALSE | FALSE | TRUE  | TRUE  | FALSE | FALSE |



$$Q(\text{critical}) = Q(0.05) * \text{SQRT}(\text{SUM VARIANCE}/20/3)$$

Spot 51

|    | 0        | 1        | 2        | 4        | 8        | 12 | 13 | 14 | 16 | 20 |
|----|----------|----------|----------|----------|----------|----|----|----|----|----|
| 0  | 1.057848 | 0.084967 | 0.021658 | 0.152318 | 0.252932 |    |    |    |    |    |
| 1  | 0.747164 | 0.07612  | 0.017383 |          |          |    |    |    |    |    |
| 2  | 0.718954 | 0.030713 | 0.00283  |          |          |    |    |    |    |    |
| 4  | 0.619326 | 0.006936 | 0.000144 |          |          |    |    |    |    |    |
| 8  | 0.554213 | 0.020867 | 0.001306 |          |          |    |    |    |    |    |
| 12 | 0.884585 | 0.018492 | 0.001026 |          |          |    |    |    |    |    |
| 13 | 0.996318 | 0.015652 | 0.000735 |          |          |    |    |    |    |    |
| 14 | 1.184674 | 0.168712 | 0.085391 |          |          |    |    |    |    |    |
| 16 | 1.012297 | 0.05158  | 0.007982 |          |          |    |    |    |    |    |
| 20 | 1.187461 | 0.067977 | 0.013863 |          |          |    |    |    |    |    |

Spot 52

|    | 0        | 1        | 2        | 4        | 8       | 12 | 13 | 14 | 16 | 20 |
|----|----------|----------|----------|----------|---------|----|----|----|----|----|
| 0  | 1.0518   | 0.026554 | 0.002115 | 0.111929 | 0.21682 |    |    |    |    |    |
| 1  | 0.980306 | 0.055012 | 0.009079 |          |         |    |    |    |    |    |
| 2  | 1.000835 | 0.060251 | 0.010891 |          |         |    |    |    |    |    |
| 4  | 1.002942 | 0.038448 | 0.004435 |          |         |    |    |    |    |    |
| 8  | 0.992163 | 0.03475  | 0.003623 |          |         |    |    |    |    |    |
| 12 | 0.909271 | 0.023861 | 0.001708 |          |         |    |    |    |    |    |
| 13 | 0.821216 | 0.011515 | 0.000398 |          |         |    |    |    |    |    |
| 14 | 0.971631 | 0.063422 | 0.012067 |          |         |    |    |    |    |    |
| 16 | 1.042463 | 0.131844 | 0.052148 |          |         |    |    |    |    |    |
| 20 | 1.04628  | 0.0718   | 0.015466 |          |         |    |    |    |    |    |

Spot 53

|    | 0        | 1        | 2        | 4        | 8      | 12 | 13 | 14 | 16 | 20 |
|----|----------|----------|----------|----------|--------|----|----|----|----|----|
| 0  | 1.0564   | 0.042511 | 0.005421 | 0.193797 | 0.2853 |    |    |    |    |    |
| 1  | 0.944782 | 0.099164 | 0.0295   |          |        |    |    |    |    |    |
| 2  | 1.037397 | 0.148713 | 0.066347 |          |        |    |    |    |    |    |
| 4  | 0.823894 | 0.034728 | 0.003618 |          |        |    |    |    |    |    |
| 8  | 0.932147 | 0.085235 | 0.021795 |          |        |    |    |    |    |    |
| 12 | 0.902252 | 0.049354 | 0.007308 |          |        |    |    |    |    |    |
| 13 | 1.125881 | 0.064807 | 0.0126   |          |        |    |    |    |    |    |
| 14 | 1.182502 | 0.069142 | 0.014342 |          |        |    |    |    |    |    |
| 16 | 1.138066 | 0.077032 | 0.017802 |          |        |    |    |    |    |    |
| 20 | 1.059145 | 0.070861 | 0.015064 |          |        |    |    |    |    |    |

Spot 54

|    | 0        | 1        | 2        | 4        | 8        | 12 | 13 | 14 | 16 | 20 |
|----|----------|----------|----------|----------|----------|----|----|----|----|----|
| 0  | 0.965893 | 0.051422 | 0.007933 | 0.064448 | 0.164526 |    |    |    |    |    |
| 1  | 0.876458 | 0.021239 | 0.001353 |          |          |    |    |    |    |    |
| 2  | 0.822654 | 0.009723 | 0.000284 |          |          |    |    |    |    |    |
| 4  | 0.963551 | 0.050312 | 0.007594 |          |          |    |    |    |    |    |
| 8  | 0.985573 | 0.05007  | 0.007521 |          |          |    |    |    |    |    |
| 12 | 1.054505 | 0.042311 | 0.005371 |          |          |    |    |    |    |    |
| 13 | 0.924591 | 0.068776 | 0.014191 |          |          |    |    |    |    |    |
| 14 | 0.87517  | 0.038696 | 0.004492 |          |          |    |    |    |    |    |
| 16 | 0.814442 | 0.017197 | 0.000887 |          |          |    |    |    |    |    |
| 20 | 0.90112  | 0.070293 | 0.014823 |          |          |    |    |    |    |    |

Spot 55

|    | 0        | 1        | 2        | 4        | 8        | 12 | 13 | 14 | 16 | 20 |
|----|----------|----------|----------|----------|----------|----|----|----|----|----|
| 0  | 0.907956 | 0.015595 | 0.00073  | 0.031556 | 0.115125 |    |    |    |    |    |
| 1  | 0.861616 | 0.023112 | 0.001603 |          |          |    |    |    |    |    |
| 2  | 0.866683 | 0.022582 | 0.00153  |          |          |    |    |    |    |    |
| 4  | 0.98936  | 0.01742  | 0.00091  |          |          |    |    |    |    |    |
| 8  | 0.985385 | 0.04537  | 0.006175 |          |          |    |    |    |    |    |
| 12 | 1.010149 | 0.027594 | 0.002284 |          |          |    |    |    |    |    |
| 13 | 0.908654 | 0.029351 | 0.002584 |          |          |    |    |    |    |    |
| 14 | 0.846512 | 0.036599 | 0.004018 |          |          |    |    |    |    |    |
| 16 | 0.800441 | 0.033617 | 0.00339  |          |          |    |    |    |    |    |
| 20 | 0.872634 | 0.052697 | 0.008331 |          |          |    |    |    |    |    |

significant x vs y?

|    | 0     | 1     | 2     | 4     | 8    | 12    | 13    | 14    | 16    |
|----|-------|-------|-------|-------|------|-------|-------|-------|-------|
| 0  |       |       |       |       |      |       |       |       |       |
| 1  | TRUE  |       |       |       |      |       |       |       |       |
| 2  | TRUE  | FALSE |       |       |      |       |       |       |       |
| 4  | TRUE  | FALSE | FALSE |       |      |       |       |       |       |
| 8  | TRUE  | FALSE | FALSE | FALSE |      |       |       |       |       |
| 12 | FALSE | FALSE | FALSE | TRUE  | TRUE |       |       |       |       |
| 13 | FALSE | FALSE | TRUE  | TRUE  | TRUE | FALSE |       |       |       |
| 14 | FALSE | TRUE  | TRUE  | TRUE  | TRUE | FALSE | FALSE |       |       |
| 16 | FALSE | TRUE  | TRUE  | TRUE  | TRUE | FALSE | FALSE | FALSE |       |
| 20 | FALSE | TRUE  | TRUE  | TRUE  | TRUE | TRUE  | FALSE | FALSE | FALSE |

|    | 0     | 1     | 2     | 4     | 8     | 12    | 13    | 14    | 16    |
|----|-------|-------|-------|-------|-------|-------|-------|-------|-------|
| 0  |       |       |       |       |       |       |       |       |       |
| 1  | FALSE |       |       |       |       |       |       |       |       |
| 2  | FALSE | FALSE |       |       |       |       |       |       |       |
| 4  | FALSE | FALSE | FALSE |       |       |       |       |       |       |
| 8  | FALSE | FALSE | FALSE | FALSE |       |       |       |       |       |
| 12 | FALSE | FALSE | FALSE | FALSE | FALSE |       |       |       |       |
| 13 | TRUE  | FALSE | FALSE | FALSE | FALSE | FALSE |       |       |       |
| 14 | FALSE |       |       |
| 16 | FALSE | FALSE | FALSE | FALSE | FALSE | FALSE | TRUE  | FALSE |       |
| 20 | FALSE | FALSE | FALSE | FALSE | FALSE | FALSE | TRUE  | FALSE | FALSE |

|    | 0     | 1     | 2     | 4     | 8     | 12    | 13    | 14    | 16    |
|----|-------|-------|-------|-------|-------|-------|-------|-------|-------|
| 0  |       |       |       |       |       |       |       |       |       |
| 1  | FALSE |       |       |       |       |       |       |       |       |
| 2  | FALSE | FALSE |       |       |       |       |       |       |       |
| 4  | FALSE | FALSE | FALSE |       |       |       |       |       |       |
| 8  | FALSE | FALSE | FALSE | FALSE |       |       |       |       |       |
| 12 | FALSE | FALSE | FALSE | FALSE | FALSE |       |       |       |       |
| 13 | FALSE | FALSE | FALSE | TRUE  | FALSE | FALSE |       |       |       |
| 14 | FALSE | FALSE | FALSE | TRUE  | FALSE | FALSE | FALSE |       |       |
| 16 | FALSE | FALSE | FALSE | TRUE  | FALSE | FALSE | FALSE | FALSE |       |
| 20 | FALSE |

|    | 0     | 1     | 2     | 4     | 8     | 12    | 13    | 14    | 16    |
|----|-------|-------|-------|-------|-------|-------|-------|-------|-------|
| 0  |       |       |       |       |       |       |       |       |       |
| 1  | FALSE |       |       |       |       |       |       |       |       |
| 2  | FALSE | FALSE |       |       |       |       |       |       |       |
| 4  | FALSE | FALSE | FALSE |       |       |       |       |       |       |
| 8  | FALSE | FALSE | FALSE | FALSE |       |       |       |       |       |
| 12 | FALSE | TRUE  | TRUE  | FALSE | FALSE |       |       |       |       |
| 13 | FALSE | FALSE | FALSE | FALSE | FALSE | FALSE |       |       |       |
| 14 | FALSE | FALSE | FALSE | FALSE | FALSE | TRUE  | FALSE |       |       |
| 16 | FALSE | FALSE | FALSE | FALSE | TRUE  | TRUE  | FALSE | FALSE |       |
| 20 | FALSE |

|    | 0     | 1     | 2     | 4     | 8     | 12    | 13    | 14    | 16    |
|----|-------|-------|-------|-------|-------|-------|-------|-------|-------|
| 0  |       |       |       |       |       |       |       |       |       |
| 1  | FALSE |       |       |       |       |       |       |       |       |
| 2  | FALSE | FALSE |       |       |       |       |       |       |       |
| 4  | FALSE | TRUE  | TRUE  |       |       |       |       |       |       |
| 8  | FALSE | TRUE  | TRUE  | FALSE |       |       |       |       |       |
| 12 | FALSE | TRUE  | TRUE  | FALSE | FALSE |       |       |       |       |
| 13 | FALSE | FALSE | FALSE | FALSE | FALSE | FALSE |       |       |       |
| 14 | FALSE | FALSE | FALSE | TRUE  | TRUE  | TRUE  | FALSE |       |       |
| 16 | FALSE | FALSE | FALSE | TRUE  | TRUE  | TRUE  | FALSE | FALSE |       |
| 20 | FALSE | FALSE | FALSE | TRUE  | FALSE | TRUE  | FALSE | FALSE | FALSE |
