# Supplementary material
Source: PubMed Central journal article supplement (PMC2953910)
Supplement: supp_M110.001214_mcp.M110.001214-6.pdf [file supp_M110.001214_mcp.M110.001214-6.pdf]

**Supplementary Table 3. Tukey range analysis of substrate-dependent oxygen consumption and enzymatic assays in Figure 2-4**

| GDH - deamination |          |           |          |              | Q (critical) = Q (0.05) * SQRT( SUM VARIANCE/ Q(s) |       |       |       |       |       |       |       |      |      |    | significant x vs y? |       |       |       |       |       |       |       |       |       |  |
|-------------------|----------|-----------|----------|--------------|----------------------------------------------------|-------|-------|-------|-------|-------|-------|-------|------|------|----|---------------------|-------|-------|-------|-------|-------|-------|-------|-------|-------|--|
|                   | Mean     | Std error | variance | Sum variance | 0                                                  | 1     | 2     | 4     | 8     | 12    | 13    | 14    | 16   | 20   | 0  | 1                   | 2     | 4     | 8     | 12    | 13    | 14    | 16    |       |       |  |
| 0                 | 541.5863 | 42.39512  | 5392.038 | 40722.64     | 130.7814                                           |       |       |       |       |       |       |       |      |      | 0  |                     |       |       |       |       |       |       |       |       |       |  |
| 1                 | 540.4073 | 2.853918  | 24.43454 |              |                                                    | 1.2   |       |       |       |       |       |       |      |      | 1  | FALSE               |       |       |       |       |       |       |       |       |       |  |
| 2                 | 490.4609 | 34.90898  | 3655.911 |              |                                                    | 51.1  | 49.9  |       |       |       |       |       |      |      | 2  | FALSE               | FALSE |       |       |       |       |       |       |       |       |  |
| 4                 | 475.6699 | 55.6587   | 9293.673 |              |                                                    | 65.9  | 64.7  | 14.8  |       |       |       |       |      |      | 4  | FALSE               | FALSE | FALSE |       |       |       |       |       |       |       |  |
| 8                 | 526.1522 | 9.526468  | 272.2608 |              |                                                    | 15.4  | 14.3  | 35.7  | 50.5  |       |       |       |      |      | 8  | FALSE               | FALSE | FALSE | FALSE |       |       |       |       |       |       |  |
| 12                | 352.1222 | 25.11775  | 1892.705 |              |                                                    | 189.5 | 188.3 | 138.3 | 123.5 | 174.0 |       |       |      |      | 12 | TRUE                | TRUE  | TRUE  | FALSE | TRUE  |       |       |       |       |       |  |
| 13                | 408.4673 | 55.65344  | 9291.915 |              |                                                    | 133.1 | 131.9 | 82.0  | 67.2  | 117.7 | 56.3  |       |      |      | 13 | TRUE                | TRUE  | FALSE | FALSE | FALSE | FALSE |       |       |       |       |  |
| 14                | 460.8789 | 55.22887  | 9150.684 |              |                                                    | 80.7  | 79.5  | 29.6  | 14.8  | 65.3  | 108.8 | 52.4  |      |      | 14 | FALSE               | FALSE | FALSE | FALSE | FALSE | FALSE | FALSE |       |       |       |  |
| 16                | 472.8832 | 17.49418  | 918.1391 |              |                                                    | 68.7  | 67.5  | 17.6  | 2.8   | 53.3  | 120.8 | 64.4  | 12.0 |      | 16 | FALSE               | FALSE | FALSE | FALSE | FALSE | FALSE | FALSE | FALSE | FALSE |       |  |
| 20                | 509.7535 | 16.64209  | 830.8778 |              |                                                    | 31.8  | 30.7  | 19.3  | 34.1  | 16.4  | 157.6 | 101.3 | 48.9 | 36.9 | 20 | FALSE               | FALSE | FALSE | FALSE | FALSE | TRUE  | FALSE | FALSE | FALSE | FALSE |  |
| OGDH              |          |           |          |              | 0                                                  | 1     | 2     | 4     | 8     | 12    | 13    | 14    | 16   | 20   | 0  | 1                   | 2     | 4     | 8     | 12    | 13    | 14    | 16    |       |       |  |
| 0                 | 118.8532 | 15.96327  | 764.4776 | 2730.855     | 33.86705                                           |       |       |       |       |       |       |       |      |      | 0  |                     |       |       |       |       |       |       |       |       |       |  |
| 1                 | 119.8821 | 8.260377  | 204.7015 |              |                                                    | 1.0   |       |       |       |       |       |       |      |      | 1  | FALSE               |       |       |       |       |       |       |       |       |       |  |
| 2                 | 133.1297 | 6.536441  | 128.1752 |              |                                                    | 14.3  | 13.2  |       |       |       |       |       |      |      | 2  | FALSE               | FALSE |       |       |       |       |       |       |       |       |  |
| 4                 | 153.5584 | 4.981375  | 74.4423  |              |                                                    | 34.7  | 33.7  | 20.4  |       |       |       |       |      |      | 4  | TRUE                | FALSE | FALSE |       |       |       |       |       |       |       |  |
| 8                 | 142.283  | 5.587181  | 93.64978 |              |                                                    | 23.4  | 22.4  | 9.2   | 11.3  |       |       |       |      |      | 8  | FALSE               | FALSE | FALSE | FALSE |       |       |       |       |       |       |  |
| 12                | 144.298  | 4.563966  | 62.48936 |              |                                                    | 25.4  | 24.4  | 11.2  | 9.3   | 2.0   |       |       |      |      | 12 | FALSE               | FALSE | FALSE | FALSE | FALSE |       |       |       |       |       |  |
| 13                | 160.2251 | 17.77988  | 948.3721 |              |                                                    | 41.4  | 40.3  | 27.1  | 6.7   | 17.9  | 15.9  |       |      |      | 13 | TRUE                | TRUE  | FALSE | FALSE | FALSE | FALSE |       |       |       |       |  |
| 14                | 137.5241 | 11.56847  | 401.4888 |              |                                                    | 18.7  | 17.6  | 4.4   | 16.0  | 4.8   | 6.8   | 22.7  |      |      | 14 | FALSE               | FALSE | FALSE | FALSE | FALSE | FALSE | FALSE |       |       |       |  |
| 16                | 131.8971 | 2.540261  | 19.35877 |              |                                                    | 13.0  | 12.0  | 1.2   | 21.7  | 10.4  | 12.4  | 28.3  | 5.6  |      | 16 | FALSE               | FALSE | FALSE | FALSE | FALSE | FALSE | FALSE | FALSE | FALSE |       |  |
| 20                | 100.9218 | 3.351583  | 33.69933 |              |                                                    | 17.9  | 19.0  | 32.2  | 52.6  | 41.4  | 43.4  | 59.3  | 36.6 | 31.0 | 20 | FALSE               | FALSE | FALSE | TRUE  | TRUE  | TRUE  | TRUE  | TRUE  | FALSE |       |  |
| Fumarase          |          |           |          |              | 0                                                  | 1     | 2     | 4     | 8     | 12    | 13    | 14    | 16   | 20   | 0  | 1                   | 2     | 4     | 8     | 12    | 13    | 14    | 16    |       |       |  |
| 0                 | 662.5185 | 25.36343  | 1929.911 | 27199.04     | 106.8821                                           |       |       |       |       |       |       |       |      |      | 0  |                     |       |       |       |       |       |       |       |       |       |  |
| 1                 | 496.2963 | 25.23653  | 1910.648 |              |                                                    | 166.2 |       |       |       |       |       |       |      |      | 1  | TRUE                |       |       |       |       |       |       |       |       |       |  |
| 2                 | 552.7111 | 37.48481  | 4215.332 |              |                                                    | 109.8 | 56.4  |       |       |       |       |       |      |      | 2  | TRUE                | FALSE |       |       |       |       |       |       |       |       |  |
| 4                 | 633.0074 | 15.21536  | 694.5212 |              |                                                    | 29.5  | 136.7 | 80.3  |       |       |       |       |      |      | 4  | FALSE               | TRUE  | FALSE |       |       |       |       |       |       |       |  |
| 8                 | 614.3407 | 13.6527   | 559.1888 |              |                                                    | 48.2  | 118.0 | 61.6  | 18.7  |       |       |       |      |      | 8  | FALSE               | TRUE  | FALSE | FALSE |       |       |       |       |       |       |  |
| 12                | 554.6963 | 52.19489  | 8172.921 |              |                                                    | 107.8 | 58.4  | 2.0   | 78.3  | 59.6  |       |       |      |      | 12 | TRUE                | FALSE | FALSE | FALSE | FALSE |       |       |       |       |       |  |
| 13                | 591.1407 | 23.51109  | 1658.314 |              |                                                    | 71.4  | 94.8  | 38.4  | 41.9  | 23.2  | 36.4  |       |      |      | 13 | FALSE               | FALSE | FALSE | FALSE | FALSE | FALSE |       |       |       |       |  |
| 14                | 579.358  | 33.22897  | 3312.494 |              |                                                    | 83.2  | 83.1  | 26.6  | 53.6  | 35.0  | 24.7  | 11.8  |      |      | 14 | FALSE               | FALSE | FALSE | FALSE | FALSE | FALSE | FALSE |       |       |       |  |
| 16                | 561.2741 | 35.15217  | 3707.025 |              |                                                    | 101.2 | 65.0  | 8.6   | 71.7  | 53.1  | 6.6   | 29.9  | 18.1 |      | 16 | FALSE               | FALSE | FALSE | FALSE | FALSE | FALSE | FALSE | FALSE | FALSE |       |  |
| 20                | 561.5704 | 18.6072   | 1038.683 |              |                                                    | 100.9 | 65.3  | 8.9   | 71.4  | 52.8  | 6.9   | 29.6  | 17.8 | 0.3  | 20 | FALSE               | FALSE | FALSE | FALSE | FALSE | FALSE | FALSE | FALSE | FALSE |       |  |
| NAD-ME            |          |           |          |              | 0                                                  | 1     | 2     | 4     | 8     | 12    | 13    | 14    | 16   | 20   | 0  | 1                   | 2     | 4     | 8     | 12    | 13    | 14    | 16    |       |       |  |
| 0                 | 180.4394 | 4.291263  | 55.24481 | 3885.943     | 40.39953                                           |       |       |       |       |       |       |       |      |      | 0  |                     |       |       |       |       |       |       |       |       |       |  |
| 1                 | 202.3044 | 15.77048  | 746.1237 |              |                                                    | 21.9  |       |       |       |       |       |       |      |      | 1  | FALSE               |       |       |       |       |       |       |       |       |       |  |
| 2                 | 232.1543 | 3.859637  | 44.6904  |              |                                                    | 51.7  | 29.8  |       |       |       |       |       |      |      | 2  | TRUE                | FALSE |       |       |       |       |       |       |       |       |  |
| 4                 | 235.3698 | 2.342711  | 16.46488 |              |                                                    | 54.9  | 33.1  | 3.2   |       |       |       |       |      |      | 4  | TRUE                | FALSE | FALSE |       |       |       |       |       |       |       |  |
| 8                 | 199.5713 | 3.195724  | 30.63795 |              |                                                    | 19.1  | 2.7   | 32.6  | 35.8  |       |       |       |      |      | 8  | FALSE               | FALSE | FALSE | FALSE |       |       |       |       |       |       |  |
| 12                | 175.0697 | 10.73558  | 345.7577 |              |                                                    | 5.4   | 27.2  | 57.1  | 60.3  | 24.5  |       |       |      |      | 12 | FALSE               | FALSE | TRUE  | TRUE  | FALSE |       |       |       |       |       |  |
| 13                | 156.3666 | 10.0476   | 302.8629 |              |                                                    | 24.1  | 45.9  | 75.8  | 79.0  | 43.2  | 18.7  |       |      |      | 13 | FALSE               | TRUE  | TRUE  | TRUE  | TRUE  | FALSE |       |       |       |       |  |
| 14                | 175.5573 | 23.96484  | 1722.94  |              |                                                    | 4.9   | 26.7  | 56.6  | 59.8  | 24.0  | 0.5   | 19.2  |      |      | 14 | FALSE               | FALSE | TRUE  | TRUE  | FALSE | FALSE | FALSE |       |       |       |  |
| 16                | 202.6259 | 5.60963   | 94.40384 |              |                                                    | 22.2  | 0.3   | 29.5  | 32.7  | 3.1   | 27.6  | 46.3  | 27.1 |      | 16 | FALSE               | FALSE | FALSE | FALSE | FALSE | FALSE | TRUE  | FALSE |       |       |  |
| 20                | 183.5959 | 13.25163  | 526.8169 |              |                                                    | 3.2   | 18.7  | 48.6  | 51.8  | 16.0  | 8.5   | 27.2  | 8.0  | 19.0 | 20 | FALSE               | FALSE | TRUE  | TRUE  | FALSE | FALSE | FALSE | FALSE | FALSE |       |  |

| Aconitase |          |          |          |         |         | 0 1 2 4 8 12 13 14 16 20 |      |       |       |       |       | 0 1 2 4 8 12 13 14 16 |       |       |       |       |       |       |       |       |       |       |       |       |       |       |  |
|-----------|----------|----------|----------|---------|---------|--------------------------|------|-------|-------|-------|-------|-----------------------|-------|-------|-------|-------|-------|-------|-------|-------|-------|-------|-------|-------|-------|-------|--|
| 0         | 350.7074 | 19.36995 | 1125.585 | 24651.2 | 101.753 | 0                        |      |       |       |       |       |                       |       |       |       |       | 0     |       |       |       |       |       |       |       |       |       |  |
| 1         | 376.1093 | 36.9336  | 4092.273 |         |         | 1                        | 25.4 |       |       |       |       |                       |       |       |       |       |       | 1     | FALSE |       |       |       |       |       |       |       |  |
| 2         | 427.7599 | 15.91162 | 759.5386 |         |         | 2                        | 77.1 | 51.7  |       |       |       |                       |       |       |       |       |       | 2     | FALSE | FALSE |       |       |       |       |       |       |  |
| 4         | 371.8864 | 30.78682 | 2843.484 |         |         | 4                        | 21.2 | 4.2   | 55.9  |       |       |                       |       |       |       |       | 4     | FALSE | FALSE | FALSE |       |       |       |       |       |       |  |
| 8         | 368.8103 | 20.60472 | 1273.663 |         |         | 8                        | 18.1 | 7.3   | 58.9  | 3.1   |       |                       |       |       |       | 8     | FALSE | FALSE | FALSE | FALSE |       |       |       |       |       |       |  |
| 12        | 322.5509 | 49.91781 | 7475.362 |         |         | 12                       | 28.2 | 53.6  | 105.2 | 49.3  | 46.3  |                       |       |       | 12    | FALSE | FALSE | TRUE  | FALSE | FALSE |       |       |       |       |       |       |  |
| 13        | 263.5584 | 35.64812 | 3812.366 |         |         | 13                       | 87.1 | 112.6 | 164.2 | 108.3 | 105.3 | 59.0                  |       | 13    | FALSE | TRUE  | TRUE  | TRUE  | TRUE  | FALSE |       |       |       |       |       |       |  |
| 14        | 254.6088 | 25.51913 | 1953.678 |         |         | 14                       | 96.1 | 121.5 | 173.2 | 117.3 | 114.2 | 67.9                  | 8.9   |       | 14    | FALSE | TRUE  | TRUE  | TRUE  | TRUE  | FALSE | FALSE |       |       |       |       |  |
| 16        | 392.8189 | 15.22878 | 695.7469 |         |         | 16                       | 42.1 | 16.7  | 34.9  | 20.9  | 24.0  | 70.3                  | 129.3 | 138.2 |       | 16    | FALSE | FALSE | FALSE | FALSE | FALSE | FALSE | TRUE  | TRUE  |       |       |  |
| 20        | 310.0857 | 14.3701  | 619.4997 |         |         | 20                       | 40.6 | 66.0  | 117.7 | 61.8  | 58.7  | 12.5                  | 46.5  | 55.5  | 82.7  |       | 20    | FALSE | FALSE | TRUE  | FALSE | FALSE | FALSE | FALSE | FALSE | FALSE |  |

| CysS |          |          |          |        |        | 0 1 2 4 8 12 13 14 16 20 |       |       |       |       |       | 0 1 2 4 8 12 13 14 16 |       |       |       |       |       |       |       |       |       |       |       |       |       |       |       |  |
|------|----------|----------|----------|--------|--------|--------------------------|-------|-------|-------|-------|-------|-----------------------|-------|-------|-------|-------|-------|-------|-------|-------|-------|-------|-------|-------|-------|-------|-------|--|
| 0    | 683.7597 | 40.11746 | 4828.231 | 215484 | 300.84 | 0                        |       |       |       |       |       |                       |       |       |       |       | 0     |       |       |       |       |       |       |       |       |       |       |  |
| 1    | 710.7611 | 7.291484 | 159.4972 |        |        | 1                        | 27.0  |       |       |       |       |                       |       |       |       |       | 1     | FALSE |       |       |       |       |       |       |       |       |       |  |
| 2    | 828.7936 | 94.11657 | 26573.79 |        |        | 2                        | 145.0 | 118.0 |       |       |       |                       |       |       |       | 2     | FALSE | FALSE |       |       |       |       |       |       |       |       |       |  |
| 4    | 718.7747 | 74.09742 | 16471.29 |        |        | 4                        | 35.0  | 8.0   | 110.0 |       |       |                       |       |       | 4     | FALSE | FALSE | FALSE |       |       |       |       |       |       |       |       |       |  |
| 8    | 599.5579 | 26.62397 | 2126.507 |        |        | 8                        | 84.2  | 111.2 | 229.2 | 119.2 |       |                       |       |       | 8     | FALSE | FALSE | FALSE | FALSE |       |       |       |       |       |       |       |       |  |
| 12   | 848.7684 | 96.44606 | 27905.53 |        |        | 12                       | 165.0 | 138.0 | 20.0  | 130.0 | 249.2 |                       |       |       | 12    | FALSE | FALSE | FALSE | FALSE | FALSE |       |       |       |       |       |       |       |  |
| 13   | 976.2751 | 182.6344 | 100066   |        |        | 13                       | 292.5 | 265.5 | 147.5 | 257.5 | 376.7 | 127.5                 |       |       | 13    | FALSE | FALSE | FALSE | FALSE | TRUE  | FALSE |       |       |       |       |       |       |  |
| 14   | 811.7006 | 1.918132 | 11.03769 |        |        | 14                       | 127.9 | 100.9 | 17.1  | 92.9  | 212.1 | 37.1                  | 164.6 |       | 14    | FALSE |       |       |       |       |  |
| 16   | 825.8329 | 70.43588 | 14883.64 |        |        | 16                       | 142.1 | 115.1 | 3.0   | 107.1 | 226.3 | 22.9                  | 150.4 | 14.1  |       | 16    | FALSE |       |       |  |
| 20   | 1082.07  | 86.52265 | 22458.51 |        |        | 20                       | 398.3 | 371.3 | 253.3 | 363.3 | 482.5 | 233.3                 | 105.8 | 270.4 | 256.2 |       | 20    | TRUE  | TRUE  | FALSE | TRUE  | TRUE  | FALSE | FALSE | FALSE | FALSE | FALSE |  |

| Glycine-dependent O2 consumption |          |          |          |          |          | 0 1 2 4 8 12 13 14 16 20 |      |      |      |      |      | 0 1 2 4 8 12 13 14 16 |      |      |     |      |       |       |       |       |       |       |      |      |      |      |       |  |
|----------------------------------|----------|----------|----------|----------|----------|--------------------------|------|------|------|------|------|-----------------------|------|------|-----|------|-------|-------|-------|-------|-------|-------|------|------|------|------|-------|--|
| 0                                | 37.71667 | 5.292464 | 84.03053 | 227.3415 | 9.771639 | 0                        |      |      |      |      |      |                       |      |      |     |      | 0     |       |       |       |       |       |      |      |      |      |       |  |
| 1                                | 27.27    | 0.639557 | 1.2271   |          |          | 1                        | 10.4 |      |      |      |      |                       |      |      |     |      | 1     | TRUE  |       |       |       |       |      |      |      |      |       |  |
| 2                                | 24.84333 | 1.578452 | 7.474533 |          |          | 2                        | 12.9 | 2.4  |      |      |      |                       |      |      |     | 2    | TRUE  | FALSE |       |       |       |       |      |      |      |      |       |  |
| 4                                | 19.30667 | 0.749363 | 1.684633 |          |          | 4                        | 18.4 | 8.0  | 5.5  |      |      |                       |      |      | 4   | TRUE | FALSE | FALSE |       |       |       |       |      |      |      |      |       |  |
| 8                                | 14.75    | 0.672111 | 1.3552   |          |          | 8                        | 23.0 | 12.5 | 10.1 | 4.6  |      |                       |      |      | 8   | TRUE | TRUE  | TRUE  | FALSE |       |       |       |      |      |      |      |       |  |
| 12                               | 4.943333 | 0.776431 | 1.808533 |          |          | 12                       | 32.8 | 22.3 | 19.9 | 14.4 | 9.8  |                       |      |      | 12  | TRUE | TRUE  | TRUE  | TRUE  | TRUE  |       |       |      |      |      |      |       |  |
| 13                               | 11.38667 | 2.36856  | 16.83023 |          |          | 13                       | 26.3 | 15.9 | 13.5 | 7.9  | 3.4  | 6.4                   |      |      | 13  | TRUE | TRUE  | TRUE  | FALSE | FALSE | FALSE |       |      |      |      |      |       |  |
| 14                               | 17.52333 | 4.38271  | 57.62443 |          |          | 14                       | 20.2 | 9.7  | 7.3  | 1.8  | 2.8  | 12.6                  | 6.1  |      | 14  | TRUE | FALSE | FALSE | FALSE | FALSE | TRUE  | FALSE |      |      |      |      |       |  |
| 16                               | 31.26333 | 3.478766 | 36.30543 |          |          | 16                       | 6.5  | 4.0  | 6.4  | 12.0 | 16.5 | 26.3                  | 19.9 | 13.7 |     | 16   | FALSE | FALSE | FALSE | TRUE  | TRUE  | TRUE  | TRUE | TRUE | TRUE |      |       |  |
| 20                               | 36.15333 | 2.516667 | 19.00083 |          |          | 20                       | 1.6  | 8.9  | 11.3 | 16.8 | 21.4 | 31.2                  | 24.8 | 18.6 | 4.9 |      | 20    | FALSE | FALSE | TRUE  | TRUE  | TRUE  | TRUE | TRUE | TRUE | TRUE | FALSE |  |

| NADH-dependent O2 consumption |          |          |          |        |          | 0 1 2 4 8 12 13 14 16 20 |      |      |      |      |      | 0 1 2 4 8 12 13 14 16 |      |      |      |       |       |       |       |       |       |       |       |       |       |      |  |
|-------------------------------|----------|----------|----------|--------|----------|--------------------------|------|------|------|------|------|-----------------------|------|------|------|-------|-------|-------|-------|-------|-------|-------|-------|-------|-------|------|--|
| 0                             | 85.00667 | 8.152761 | 199.4025 | 505.69 | 14.57372 | 0                        |      |      |      |      |      |                       |      |      |      |       | 0     |       |       |       |       |       |       |       |       |      |  |
| 1                             | 76.52    | 1.700157 | 8.6716   |        |          | 1                        | 8.5  |      |      |      |      |                       |      |      |      |       | 1     | FALSE |       |       |       |       |       |       |       |      |  |
| 2                             | 71.97333 | 3.278548 | 32.24663 |        |          | 2                        | 13.0 | 4.5  |      |      |      |                       |      |      |      | 2     | FALSE | FALSE |       |       |       |       |       |       |       |      |  |
| 4                             | 73.72    | 1.805187 | 9.7761   |        |          | 4                        | 11.3 | 2.8  | 1.7  |      |      |                       |      |      | 4    | FALSE | FALSE | FALSE |       |       |       |       |       |       |       |      |  |
| 8                             | 67.78667 | 3.878446 | 45.12703 |        |          | 8                        | 17.2 | 8.7  | 4.2  | 5.9  |      |                       |      |      | 8    | TRUE  | FALSE | FALSE | FALSE |       |       |       |       |       |       |      |  |
| 12                            | 60.17667 | 2.181546 | 14.27743 |        |          | 12                       | 24.8 | 16.3 | 11.8 | 13.5 | 7.6  |                       |      |      | 12   | TRUE  | TRUE  | FALSE | FALSE | FALSE |       |       |       |       |       |      |  |
| 13                            | 56.13    | 4.736342 | 67.2988  |        |          | 13                       | 28.9 | 20.4 | 15.8 | 17.6 | 11.7 | 4.0                   |      |      | 13   | TRUE  | TRUE  | TRUE  | TRUE  | FALSE | FALSE |       |       |       |       |      |  |
| 14                            | 60.37333 | 2.860264 | 24.54333 |        |          | 14                       | 24.6 | 16.1 | 11.6 | 13.3 | 7.4  | 0.2                   | 4.2  |      | 14   | TRUE  | TRUE  | FALSE | FALSE | FALSE | FALSE | FALSE | FALSE |       |       |      |  |
| 16                            | 62.57333 | 3.718083 | 41.47243 |        |          | 16                       | 22.4 | 13.9 | 9.4  | 11.1 | 5.2  | 2.4                   | 6.4  | 2.2  |      | 16    | TRUE  | FALSE |      |  |
| 20                            | 80.48    | 4.577994 | 62.8741  |        |          | 20                       | 4.5  | 4.0  | 8.5  | 6.8  | 12.7 | 20.3                  | 24.4 | 20.1 | 17.9 |       | 20    | FALSE | FALSE | FALSE | FALSE | FALSE | TRUE  | TRUE  | TRUE  | TRUE |  |
